# Supplementary material for: Spectroscopic and Computational Characterization of 2-Aza-1,3-butadiene, a Molecule of Astrochemical Significance
Source: PubMed Central journal article supplement (PMC8958585; doi:10.1021/acs.jpca.2c00831), 2022-03-11
Supplement: jp2c00831_si_001.pdf [file jp2c00831_si_001.pdf]

**Supporting Information:**  
**Spectroscopic and Computational**  
**Characterization of 2-aza-1,3-butadiene, a**  
**Molecule of Astrochemical Significance**

Ningjing Jiang,<sup>†</sup> Mattia Melosso,<sup>\*,†,‡</sup> Luca Bizzocchi,<sup>†</sup> Silvia Alessandrini,<sup>¶</sup>  
Jean-Claude Guillemin,<sup>§</sup> Luca Dore,<sup>†</sup> and Cristina Puzzarini<sup>\*,†</sup>

<sup>†</sup>*Dipartimento di Chimica “Giacomo Ciamician”, Università di Bologna, Via F. Selmi 2,  
40126 Bologna, Italy*

<sup>‡</sup>*Scuola Superiore Meridionale, Università di Napoli Federico II, Largo San Marcellino 10,  
80138 Naples, Italy*

<sup>¶</sup>*Scuola Normale Superiore, Piazza dei Cavalieri 7, 56126 Pisa, Italy*

<sup>§</sup>*Univ Rennes, Ecole Nationale Supérieure de Chimie de Rennes, CNRS, ISCR-UMR6226,  
F-35000 Rennes, France*

E-mail: mattia.mellosso2@unibo.it; cristina.puzzarini@unibo.it

# Quantum-Chemical Calculations

## Molecular Structures

The tables here below collect the Cartesian coordinates of *trans*- and *gauche*-2-azabutadiene resulting from the geometry optimization exploiting the so-called CBS+CV composite scheme (which is detailed in the main text).

**Table S1: Cartesian coordinates (in Å units) of the equilibrium CBS+CV molecular structure of *trans*-2-azabutadiene.**

| Atom | Numbering | X        | Y        | Z       |
|------|-----------|----------|----------|---------|
| C    | 1         | -1.71011 | 0.12067  | 0.00000 |
| N    | 2         | -0.57211 | -0.45098 | 0.00000 |
| H    | 3         | -1.82638 | 1.20772  | 0.00000 |
| H    | 4         | -2.60549 | -0.48873 | 0.00000 |
| C    | 5         | 0.55033  | 0.39155  | 0.00000 |
| H    | 6         | 0.37760  | 1.46737  | 0.00000 |
| C    | 7         | 1.78346  | -0.11482 | 0.00000 |
| H    | 8         | 2.64664  | 0.53285  | 0.00000 |
| H    | 9         | 1.93062  | -1.18477 | 0.00000 |

**Table S2: Cartesian coordinates (in Å units) of the equilibrium CBS+CV molecular structure of *gauche*-2-azabutadiene.**

| Atom | Numbering | X        | Y        | Z        |
|------|-----------|----------|----------|----------|
| C    | 1         | -1.42122 | -0.47543 | 0.23080  |
| N    | 2         | -0.70711 | 0.51512  | -0.42880 |
| C    | 3         | 0.64254  | 0.51956  | 0.31276  |
| H    | 4         | -1.03860 | -1.27975 | 1.42511  |
| H    | 5         | -2.45071 | -0.52436 | -0.40333 |
| H    | 6         | 0.96462  | 1.44359  | 1.18595  |
| C    | 7         | 1.50251  | -0.46915 | -0.16213 |
| H    | 8         | 2.54084  | -0.37491 | 0.36299  |
| H    | 9         | 1.19027  | -1.36122 | -1.15446 |

## NBO analysis

The natural bond orbital (NBO) analysis [1] has been performed at the B3LYP-D3(BJ)/jun-cc-pVTZ level [2-4] using the fc-CCSD(T)/cc-pVTZ geometry. The Gaussian 16 [5] has been employed.

**Table S3: Second-order perturbation theory analysis of Fock matrix in NBO basis for 2-azabutadiene (threshold for printing: 4 kcal/mol).**

| Donor (L) NBO | Acceptor (NL) NBO | E(2)<br>(kcal/mol) |       |       |
|---------------|-------------------|--------------------|-------|-------|
| <i>trans</i>  |                   |                    |       |       |
| LP(1)         | N2                | BD*(1)             | C1-H3 | 9.93  |
| LP(1)         | N2                | BD*(1)             | C1-H4 | 5.36  |
| LP(1)         | N2                | BD*(1)             | C5-H6 | 7.71  |
| LP(1)         | N2                | RY (1)             | C1    | 4.13  |
| BD(2)         | C1-N2             | BD*(2)             | C5-C7 | 16.67 |
| BD(1)         | C1-H4             | BD*(1)             | N2-C5 | 5.27  |
| BD(2)         | C5-C7             | BD*(2)             | C1-N2 | 14.17 |
| BD(1)         | C7-H8             | BD*(1)             | N2-C5 | 5.64  |
| BD(1)         | C7-H9             | BD*(1)             | C5-H6 | 4.93  |
| <i>gauche</i> |                   |                    |       |       |
| LP(1)         | N2                | BD*(1)             | C1-H4 | 10.27 |
| LP(1)         | N2                | BD*(1)             | C1-H5 | 5.47  |
| LP(1)         | N2                | BD*(1)             | C3-C7 | 7.70  |
| BD(2)         | C1-N2             | BD*(2)             | C3-C7 | 9.37  |
| BD(1)         | C1-H5             | BD*(1)             | N2-C3 | 5.55  |
| BD(1)         | C3-H6             | BD*(1)             | C7-H9 | 4.06  |
| BD(2)         | C3-C7             | BD*(2)             | C1-N2 | 7.73  |
| BD(1)         | C7-H8             | BD*(1)             | N2-C3 | 6.19  |
| BD(1)         | C7-H9             | BD*(1)             | C3-H6 | 4.66  |

## References

1. E.D. Glendening, C. R. Landis, F. Weinhold, Wiley Interdiscip. Rev.: Comput. Mol. Sci. 2012, 2, 1-42.
2. a) A. D. Becke, J. Chem. Phys. 1993, 98, 5648-5652; b) P. J. Stephens, F. J. Devlin, C. F. Chabalowski, M. J. Frisch, J. Phys. Chem. 1994, 98, 11623-11627.
3. a) S. Grimme, J. Antony, S. Ehrlich, H. Krieg, J. Chem. Phys. 2010, 132, 154104; b) S. Grimme, S. Ehrlich, L. Goerigk, J. Comput. Chem. 2011, 32, 1456-1465.

4. a) E. Papajak, D. G. Truhlar, *J. Chem. Theory Comput.* 2011, 7, 10-18; b) E. Papajak, J. Zheng, X. Xu, H. R. Leverentz, D. G. Truhlar, *J. Chem. Theory Comput.* 2011, 7, 3027-3034.
5. Gaussian16, RevisionC.01, M. J. Frisch, G.W. Trucks, H. B. Schlegel, G. E. Scuseria, M. A. Robb, J. R. Cheeseman, G. Scalmani, V. Barone, G. A. Petersson, H. Nakatsuji et al., Gaussian, Inc., Wallingford CT, 2016.

## Fundamental Frequencies and Vibration-rotation Interaction Constants

Harmonic and anharmonic force-field calculations have been carried out: the former at the fc-CCSD(T)/cc-pVTZ level and the latter at the fc-MP2/cc-pVTZ level. The reader is referred to the main text for all details. For *trans*- and *gauche*-2-azabutadiene, the tables here below collect the fc-CCSD(T)/cc-pVTZ fundamental harmonic frequencies, which have been corrected for anharmonic effects at the fc-MP2/cc-pVTZ level. Anharmonic force-field calculations also provide the vibration-rotation interaction constants ( $\alpha$ ), which are reported in the last three columns.

**Table S4: Fundamental harmonic and anharmonic frequencies, harmonic IR intensities, and vibration-rotation  $\alpha$  constants of *trans*-2-azabutadiene.**

| Mode       | Symmetry | Harmonic <sup>a</sup><br>(cm <sup>-1</sup> ) | Anharmonic <sup>b</sup><br>(cm <sup>-1</sup> ) | Intensity <sup>a</sup><br>(km/mol) | $\alpha^{Ab}$<br>(MHz) | $\alpha^{Bb}$<br>(MHz) | $\alpha^{Cb}$<br>(MHz) |
|------------|----------|----------------------------------------------|------------------------------------------------|------------------------------------|------------------------|------------------------|------------------------|
| $\nu_1$    | $A'$     | 3260.708                                     | 3122.046                                       | 2.126                              | -86.142                | -3.431                 | -3.212                 |
| $\nu_2$    | $A'$     | 3179.595                                     | 3043.330                                       | 14.570                             | -28.895                | -4.256                 | -3.419                 |
| $\nu_3$    | $A'$     | 3164.736                                     | 3048.293                                       | 1.224                              | -112.767               | -2.606                 | -3.149                 |
| $\nu_4$    | $A'$     | 3093.314                                     | 2961.648                                       | 29.735                             | -68.519                | -4.405                 | -3.981                 |
| $\nu_5$    | $A'$     | 3028.656                                     | 2885.550                                       | 41.738                             | -90.738                | -2.244                 | -2.497                 |
| $\nu_6$    | $A'$     | 1677.347                                     | 1632.243                                       | 14.089                             | -49.060                | -12.362                | -11.946                |
| $\nu_7$    | $A'$     | 1659.517                                     | 1615.536                                       | 7.502                              | -82.376                | -8.141                 | -9.249                 |
| $\nu_8$    | $A'$     | 1487.676                                     | 1454.777                                       | 5.649                              | 68.914                 | -0.964                 | -3.530                 |
| $\nu_9$    | $A'$     | 1427.145                                     | 1374.583                                       | 4.162                              | 143.169                | 2.367                  | -2.473                 |
| $\nu_{10}$ | $A'$     | 1320.392                                     | 1294.994                                       | 3.730                              | 43.661                 | 2.678                  | -1.004                 |
| $\nu_{11}$ | $A'$     | 1256.284                                     | 1227.969                                       | 22.613                             | 348.674                | -3.662                 | -11.371                |
| $\nu_{12}$ | $A'$     | 1116.303                                     | 1096.228                                       | 0.647                              | 524.620                | 2.642                  | -7.833                 |
| $\nu_{13}$ | $A'$     | 913.614                                      | 897.367                                        | 3.572                              | -646.033               | -15.360                | -9.121                 |
| $\nu_{14}$ | $A'$     | 559.312                                      | 552.353                                        | 2.342                              | 29.645                 | -6.423                 | -5.954                 |
| $\nu_{15}$ | $A'$     | 333.840                                      | 333.523                                        | 1.787                              | 1229.766               | 0.379                  | -4.159                 |
| $\nu_{16}$ | $A''$    | 1037.650                                     | 1016.705                                       | 23.108                             | -592.352               | -5.690                 | 1.028                  |
| $\nu_{17}$ | $A''$    | 990.175                                      | 966.397                                        | 15.191                             | -252.181               | -1.914                 | 1.311                  |
| $\nu_{18}$ | $A''$    | 924.745                                      | 907.428                                        | 36.553                             | 927.470                | -2.579                 | 0.862                  |
| $\nu_{19}$ | $A''$    | 810.894                                      | 793.761                                        | 0.005                              | -702.662               | -3.224                 | 1.106                  |
| $\nu_{20}$ | $A''$    | 605.003                                      | 587.189                                        | 1.919                              | -37.892                | -6.734                 | -1.151                 |
| $\nu_{21}$ | $A''$    | 147.388                                      | 141.566                                        | 7.122                              | -1437.656              | 4.099                  | 16.012                 |

<sup>a</sup> At the fc-CCSD(T)/cc-pVTZ level.

<sup>b</sup> At the fc-MP2/cc-pVTZ level.

**Table S5: Fundamental harmonic and anharmonic frequencies, harmonic IR intensities, and vibration-rotation  $\alpha$  constants of *gauche*-2-azabutadiene.**

| Mode       | Harmonic <sup>a</sup><br>(cm <sup>-1</sup> ) | Anharmonic <sup>b</sup><br>(cm <sup>-1</sup> ) | Intensity <sup>a</sup><br>(km/mol) | $\alpha^A$ <sup>b</sup><br>(MHz) | $\alpha^B$ <sup>b</sup><br>(MHz) | $\alpha^C$ <sup>b</sup><br>(MHz) |
|------------|----------------------------------------------|------------------------------------------------|------------------------------------|----------------------------------|----------------------------------|----------------------------------|
| $\nu_1$    | 3251.440                                     | 3112.714                                       | 8.159                              | -34.615                          | -3.321                           | -3.946                           |
| $\nu_2$    | 3181.832                                     | 3045.840                                       | 6.518                              | 5.277                            | -13.904                          | -7.069                           |
| $\nu_3$    | 3173.785                                     | 3038.410                                       | 21.446                             | 3.343                            | -8.405                           | -5.163                           |
| $\nu_4$    | 3154.802                                     | 3045.835                                       | 2.464                              | -28.773                          | -3.794                           | -3.654                           |
| $\nu_5$    | 3042.319                                     | 2901.837                                       | 30.438                             | -26.680                          | -1.554                           | -3.128                           |
| $\nu_6$    | 1679.059                                     | 1633.763                                       | 19.183                             | -175.205                         | 9.173                            | 0.827                            |
| $\nu_7$    | 1659.370                                     | 1615.844                                       | 28.942                             | -84.466                          | -4.391                           | -13.768                          |
| $\nu_8$    | 1495.770                                     | 1458.825                                       | 13.315                             | 19.608                           | 3.103                            | -0.674                           |
| $\nu_9$    | 1434.862                                     | 1398.762                                       | 1.457                              | 44.849                           | 2.591                            | -1.231                           |
| $\nu_{10}$ | 1314.395                                     | 1288.622                                       | 1.708                              | -18.381                          | 7.799                            | 2.697                            |
| $\nu_{11}$ | 1220.577                                     | 1197.752                                       | 12.832                             | 71.225                           | 1.865                            | -4.758                           |
| $\nu_{12}$ | 1123.135                                     | 1094.015                                       | 12.266                             | 53.147                           | -1.884                           | -7.635                           |
| $\nu_{13}$ | 1057.543                                     | 1035.675                                       | 20.321                             | -127.331                         | -3.871                           | -1.219                           |
| $\nu_{14}$ | 991.360                                      | 968.521                                        | 24.439                             | -49.617                          | -4.210                           | 2.518                            |
| $\nu_{15}$ | 917.678                                      | 897.490                                        | 10.196                             | 89.410                           | -20.966                          | -15.205                          |
| $\nu_{16}$ | 885.565                                      | 868.530                                        | 46.776                             | -104.388                         | -14.126                          | -2.005                           |
| $\nu_{17}$ | 792.227                                      | 774.713                                        | 0.576                              | 206.070                          | -14.123                          | -1.803                           |
| $\nu_{18}$ | 705.310                                      | 695.662                                        | 4.182                              | -283.606                         | 7.969                            | -5.127                           |
| $\nu_{19}$ | 483.230                                      | 472.790                                        | 8.149                              | 119.721                          | -31.217                          | -10.880                          |
| $\nu_{20}$ | 344.228                                      | 336.221                                        | 5.753                              | 21.270                           | 0.907                            | -7.144                           |
| $\nu_{21}$ | 194.576                                      | 182.295                                        | 12.446                             | 420.341                          | -83.469                          | -21.569                          |

<sup>a</sup> At the fc-CCSD(T)/cc-pVTZ level.

<sup>b</sup> At the fc-MP2/cc-pVTZ level.

# NMR spectra of 2-[(2-chloroethyl)amino]acetonitrile and 2-azabutadiene

$^1\text{H}$  NMR spectra (400 MHz)

2-[(2-chloroethyl)amino]acetonitrile ( $\text{ClCH}_2\text{CH}_2\text{NHCH}_2\text{CN}$ ) in  $\text{CDCl}_3$

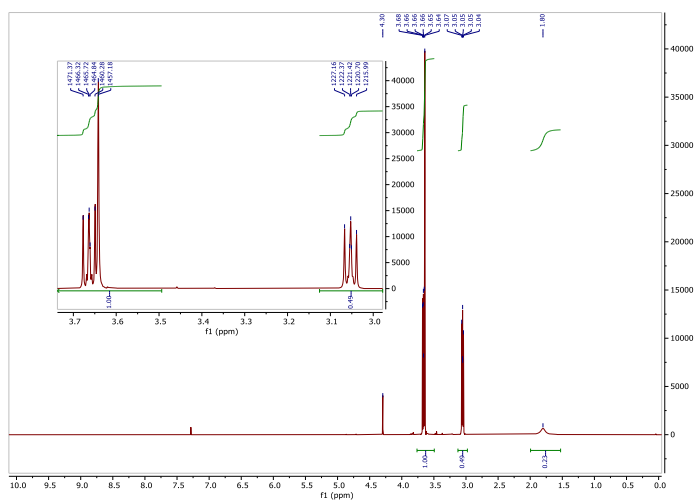

2-azabutadiene ( $\text{CH}_2=\text{N}-\text{CH}=\text{CH}_2$ ) in  $\text{CD}_2\text{Cl}_2$

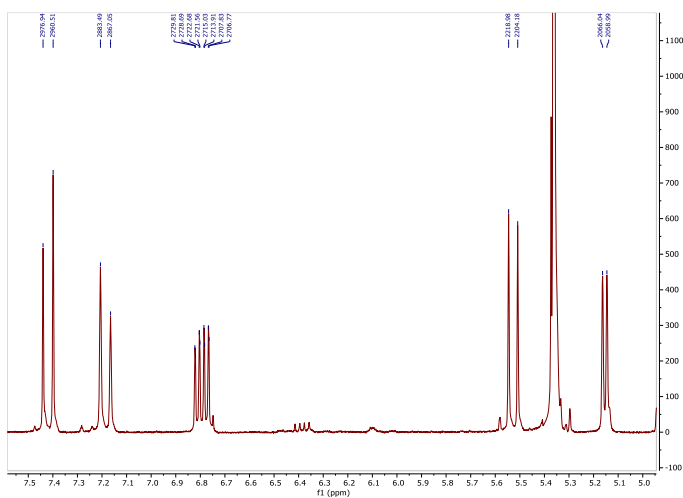

# $^{13}\text{C}$ NMR spectra (100 MHz)

2-[(2-chloroethyl)amino]acetonitrile ( $\text{ClCH}_2\text{CH}_2\text{NHCH}_2\text{CN}$ ) in  $\text{CDCl}_3$

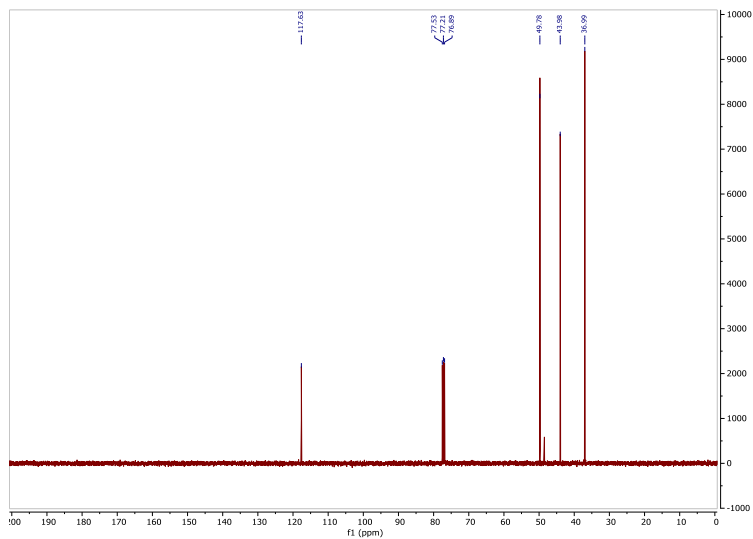

2-azabutadiene ( $\text{CH}_2=\text{N}-\text{CH}=\text{CH}_2$ ) in  $\text{CD}_2\text{Cl}_2$

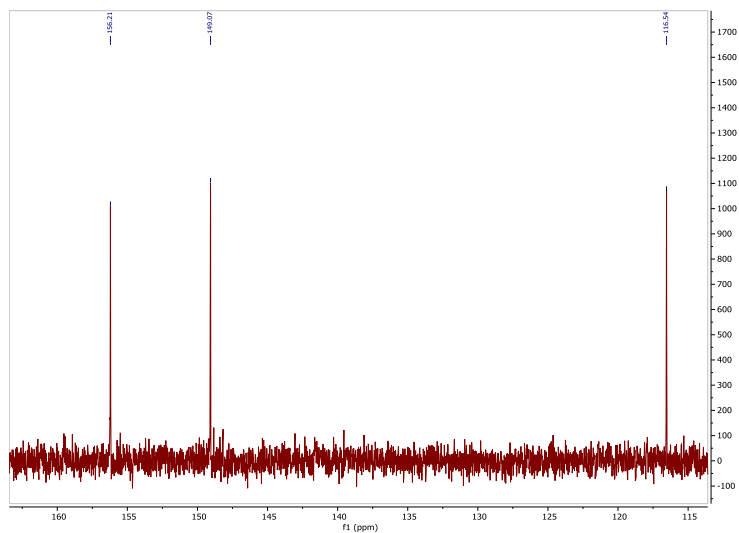



## Rotational analysis

Table S6 contains the full list of transitions included in our analysis of *trans*-2-azabutadiene. The first 4 columns are the quantum numbers of the upper state, while the next 4 columns are the quantum numbers of the lower state. The quantum numbers are  $J$ ,  $K_a$ ,  $K_c$ , and  $F$ . The last quantum number is relevant only for transitions with resolved hyperfine structure. In the absence of hyperfine splitting,  $F$  is not given. The following columns are (i) the experimental frequency, (ii) the residuals between observed frequencies and those calculated from the final set of parameters, and (iii) in case of blended lines only, the residuals between experimental frequencies and the average frequency of the blended transitions. These last 3 columns are given in units of MHz.

**Table S6: List of assigned transitions together with their residuals for *trans*-2-azabutadiene ( $S$  reduction,  $I^r$  representation).**

| $J'$ | $K'_a$ | $K'_c$ | $F'$ | $J$ | $K_a$ | $K_c$ | $F$ | Frequency | Obs.-Calc. | Average |
|------|--------|--------|------|-----|-------|-------|-----|-----------|------------|---------|
| 1    | 0      | 1      |      | 0   | 0     | 0     |     | 9316.690  | 0.095      |         |
| 2    | 0      | 2      |      | 1   | 0     | 1     |     | 18629.510 | 0.017      |         |
| 2    | 1      | 1      |      | 1   | 1     | 0     |     | 19089.610 | -0.030     |         |
| 3    | 0      | 3      |      | 2   | 0     | 2     |     | 27935.000 | 0.003      |         |
| 3    | 1      | 2      |      | 2   | 1     | 1     |     | 28632.170 | 0.081      |         |
| 3    | 2      | 2      |      | 2   | 2     | 1     |     | 27949.900 | 0.014      |         |
| 3    | 2      | 1      |      | 2   | 2     | 0     |     | 27964.560 | -0.020     |         |
| 4    | 0      | 4      |      | 3   | 0     | 3     |     | 37229.390 | -0.030     |         |
| 4    | 1      | 4      |      | 3   | 1     | 3     |     | 36346.040 | -0.018     |         |
| 4    | 1      | 3      |      | 3   | 1     | 2     |     | 38171.750 | 0.084      |         |
| 4    | 2      | 3      |      | 3   | 2     | 2     |     | 37263.550 | 0.002      |         |
| 4    | 2      | 2      |      | 3   | 2     | 1     |     | 37300.200 | -0.071     |         |
| 4    | 3      | 2      |      | 3   | 3     | 1     |     | 37274.020 | 0.000      | -0.055  |
| 4    | 3      | 1      |      | 3   | 3     | 0     |     | 37274.020 | -0.111     | -0.055  |
| 5    | 0      | 5      |      | 4   | 0     | 4     |     | 46509.100 | 0.001      |         |
| 5    | 1      | 5      |      | 4   | 1     | 4     |     | 45425.660 | 0.007      |         |
| 5    | 1      | 4      |      | 4   | 1     | 3     |     | 47707.440 | 0.069      |         |
| 5    | 2      | 4      |      | 4   | 2     | 3     |     | 46574.730 | 0.063      | 0.063   |

*Continued on next page*

Table S6 – *Continued from previous page*

| $J'$ | $K'_a$ | $K'_c$ | $F'$ | $J$ | $K_a$ | $K_c$ | $F$ | Frequency | Obs.-Calc. | Average |
|------|--------|--------|------|-----|-------|-------|-----|-----------|------------|---------|
| 5    | 2      | 4      |      | 4   | 2     | 3     |     | 46574.730 | 0.063      | 0.063   |
| 12   | 1      | 11     |      | 12  | 1     | 12    |     | 35504.870 | 0.036      |         |
| 13   | 1      | 12     |      | 13  | 1     | 13    |     | 41381.460 | -0.002     |         |
| 22   | 2      | 20     |      | 22  | 2     | 21    |     | 33225.320 | 0.000      |         |
| 23   | 2      | 21     |      | 23  | 2     | 22    |     | 38623.520 | -0.015     |         |
| 1    | 1      | 0      |      | 1   | 0     | 1     |     | 42755.610 | 0.013      |         |
| 2    | 1      | 1      |      | 2   | 0     | 2     |     | 43215.700 | -0.044     |         |
| 3    | 1      | 2      |      | 3   | 0     | 3     |     | 43912.760 | -0.076     |         |
| 4    | 1      | 3      |      | 4   | 0     | 4     |     | 44855.120 | 0.038      |         |
| 5    | 1      | 4      |      | 5   | 0     | 5     |     | 46053.310 | -0.044     |         |
| 6    | 1      | 5      |      | 6   | 0     | 6     |     | 47521.130 | 0.039      |         |
| 7    | 1      | 6      |      | 7   | 0     | 7     |     | 49274.160 | 0.005      |         |
| 6    | 0      | 6      |      | 5   | 1     | 5     |     | 16563.030 | 0.013      |         |
| 7    | 0      | 7      |      | 6   | 1     | 6     |     | 27072.170 | -0.016     |         |
| 8    | 0      | 8      |      | 7   | 1     | 7     |     | 37725.890 | 0.008      |         |
| 9    | 0      | 9      |      | 8   | 1     | 8     |     | 48501.890 | -0.035     |         |
| 7    | 2      | 6      |      | 8   | 1     | 7     |     | 44958.040 | 0.031      |         |
| 8    | 2      | 7      |      | 9   | 1     | 8     |     | 33654.500 | 0.027      |         |
| 9    | 2      | 8      |      | 10  | 1     | 9     |     | 22145.880 | 0.031      |         |
| 10   | 2      | 9      |      | 11  | 1     | 10    |     | 10437.440 | 0.011      |         |
| 13   | 1      | 12     |      | 12  | 2     | 11    |     | 13553.330 | 0.003      |         |
| 14   | 1      | 13     |      | 13  | 2     | 12    |     | 25820.440 | -0.001     |         |
| 15   | 1      | 14     |      | 14  | 2     | 13    |     | 38256.680 | 0.006      |         |
| 9    | 2      | 7      |      | 10  | 1     | 10    |     | 48420.250 | -0.003     |         |
| 10   | 2      | 8      |      | 11  | 1     | 11    |     | 42304.310 | 0.022      |         |
| 11   | 2      | 9      |      | 12  | 1     | 12    |     | 36630.750 | 0.010      |         |
| 12   | 2      | 10     |      | 13  | 1     | 13    |     | 31435.720 | 0.015      |         |
| 13   | 2      | 11     |      | 14  | 1     | 14    |     | 26755.670 | 0.010      |         |
| 14   | 2      | 12     |      | 15  | 1     | 15    |     | 22626.500 | -0.027     |         |
| 15   | 2      | 13     |      | 16  | 1     | 16    |     | 19082.590 | -0.081     |         |
| 16   | 2      | 14     |      | 17  | 1     | 17    |     | 16155.900 | -0.034     |         |
| 17   | 2      | 15     |      | 18  | 1     | 18    |     | 13874.750 | 0.003      |         |
| 18   | 2      | 16     |      | 19  | 1     | 19    |     | 12263.390 | -0.002     |         |
| 19   | 2      | 17     |      | 20  | 1     | 20    |     | 11341.460 | -0.011     |         |
| 20   | 2      | 18     |      | 21  | 1     | 21    |     | 11123.590 | -0.006     |         |
| 21   | 2      | 19     |      | 22  | 1     | 22    |     | 11619.270 | -0.022     |         |
| 22   | 2      | 20     |      | 23  | 1     | 23    |     | 12833.120 | 0.014      |         |

*Continued on next page*

Table S6 – *Continued from previous page*

| $J'$ | $K'_a$ | $K'_c$ | $F'$ | $J$ | $K_a$ | $K_c$ | $F$ | Frequency  | Obs.-Calc. | Average |
|------|--------|--------|------|-----|-------|-------|-----|------------|------------|---------|
| 23   | 2      | 21     |      | 24  | 1     | 24    |     | 14764.840  | -0.016     |         |
| 24   | 2      | 22     |      | 25  | 1     | 25    |     | 17409.900  | -0.076     |         |
| 27   | 2      | 25     |      | 28  | 1     | 28    |     | 29522.450  | 0.016      |         |
| 28   | 2      | 26     |      | 29  | 1     | 29    |     | 34901.380  | 0.021      |         |
| 29   | 2      | 27     |      | 30  | 1     | 30    |     | 40918.350  | -0.011     |         |
| 30   | 2      | 28     |      | 31  | 1     | 31    |     | 47550.050  | 0.003      |         |
| 16   | 3      | 14     |      | 17  | 2     | 15    |     | 44456.100  | 0.033      |         |
| 17   | 3      | 15     |      | 18  | 2     | 16    |     | 32925.270  | 0.002      |         |
| 19   | 3      | 17     |      | 20  | 2     | 18    |     | 8965.770   | 0.034      |         |
| 22   | 2      | 20     |      | 21  | 3     | 19    |     | 16207.250  | -0.020     |         |
| 23   | 2      | 21     |      | 22  | 3     | 20    |     | 29240.420  | -0.019     |         |
| 24   | 2      | 22     |      | 23  | 3     | 21    |     | 42560.150  | -0.003     |         |
| 22   | 3      | 19     |      | 23  | 2     | 22    |     | 12529.940  | 0.004      |         |
| 18   | 3      | 15     |      | 19  | 2     | 18    |     | 41978.680  | 0.032      |         |
| 19   | 3      | 16     |      | 20  | 2     | 19    |     | 34183.040  | 0.065      |         |
| 21   | 3      | 18     |      | 22  | 2     | 21    |     | 19425.520  | 0.029      |         |
| 27   | 2      | 26     |      | 26  | 3     | 23    |     | 10976.760  | 0.011      |         |
| 30   | 2      | 29     |      | 29  | 3     | 26    |     | 23237.050  | 0.001      |         |
| 31   | 2      | 30     |      | 30  | 3     | 27    |     | 26097.110  | 0.012      |         |
| 26   | 4      | 22     |      | 27  | 3     | 25    |     | 45318.390  | 0.024      |         |
| 27   | 4      | 23     |      | 28  | 3     | 26    |     | 36299.780  | 0.003      |         |
| 28   | 4      | 24     |      | 29  | 3     | 27    |     | 27397.040  | 0.013      |         |
| 29   | 4      | 25     |      | 30  | 3     | 28    |     | 18630.980  | 0.020      |         |
| 30   | 4      | 26     |      | 31  | 3     | 29    |     | 10024.440  | 0.008      |         |
| 25   | 4      | 22     |      | 26  | 3     | 23    |     | 45981.290  | 0.031      |         |
| 26   | 4      | 23     |      | 27  | 3     | 24    |     | 34846.120  | 0.013      |         |
| 27   | 4      | 24     |      | 28  | 3     | 25    |     | 23446.020  | 0.022      |         |
| 28   | 4      | 25     |      | 29  | 3     | 26    |     | 11759.460  | -0.004     |         |
| 31   | 3      | 28     |      | 30  | 4     | 27    |     | 12549.990  | 0.023      |         |
| 25   | 2      | 24     |      | 24  | 2     | 23    |     | 231323.656 | 0.002      |         |
| 25   | 12     | 14     |      | 24  | 12    | 13    |     | 232993.533 | 0.020      | -0.002  |
| 25   | 12     | 13     |      | 24  | 12    | 12    |     | 232993.533 | 0.020      | -0.002  |
| 25   | 13     | 12     |      | 24  | 13    | 11    |     | 232993.533 | -0.025     | -0.002  |
| 25   | 13     | 13     |      | 24  | 13    | 12    |     | 232993.533 | -0.025     | -0.002  |
| 25   | 14     | 11     |      | 24  | 14    | 10    |     | 232996.368 | -0.082     | -0.082  |
| 25   | 14     | 12     |      | 24  | 14    | 11    |     | 232996.368 | -0.082     | -0.082  |
| 25   | 11     | 15     |      | 24  | 11    | 14    |     | 232997.153 | 0.038      | 0.038   |

*Continued on next page*

Table S6 – *Continued from previous page*

| $J'$ | $K'_a$ | $K'_c$ | $F'$ | $J$ | $K_a$ | $K_c$ | $F$ | Frequency  | Obs.-Calc. | Average |
|------|--------|--------|------|-----|-------|-------|-----|------------|------------|---------|
| 25   | 11     | 14     |      | 24  | 11    | 13    |     | 232997.153 | 0.038      | 0.038   |
| 25   | 10     | 15     |      | 24  | 10    | 14    |     | 233005.609 | 0.020      | 0.020   |
| 25   | 10     | 16     |      | 24  | 10    | 15    |     | 233005.609 | 0.020      | 0.020   |
| 25   | 16     | 9      |      | 24  | 16    | 8     |     | 233008.698 | -0.077     | -0.077  |
| 25   | 16     | 10     |      | 24  | 16    | 9     |     | 233008.698 | -0.077     | -0.077  |
| 25   | 9      | 16     |      | 24  | 9     | 15    |     | 233020.879 | -0.010     | -0.010  |
| 25   | 9      | 17     |      | 24  | 9     | 16    |     | 233020.879 | -0.010     | -0.010  |
| 25   | 8      | 17     |      | 24  | 8     | 16    |     | 233046.299 | -0.003     | -0.003  |
| 25   | 8      | 18     |      | 24  | 8     | 17    |     | 233046.299 | -0.003     | -0.003  |
| 25   | 7      | 19     |      | 24  | 7     | 18    |     | 233087.735 | 0.012      | 0.012   |
| 25   | 7      | 18     |      | 24  | 7     | 17    |     | 233087.735 | 0.012      | 0.012   |
| 25   | 6      | 20     |      | 24  | 6     | 19    |     | 233156.636 | 0.017      | -0.011  |
| 25   | 6      | 19     |      | 24  | 6     | 18    |     | 233156.636 | -0.039     | -0.011  |
| 25   | 5      | 21     |      | 24  | 5     | 20    |     | 233276.858 | 0.005      |         |
| 25   | 5      | 20     |      | 24  | 5     | 19    |     | 233279.738 | 0.018      |         |
| 25   | 3      | 23     |      | 24  | 3     | 22    |     | 233427.036 | -0.040     |         |
| 25   | 4      | 22     |      | 24  | 4     | 21    |     | 233474.922 | 0.000      |         |
| 25   | 4      | 21     |      | 24  | 4     | 20    |     | 233563.333 | 0.003      |         |
| 26   | 1      | 26     |      | 25  | 1     | 25    |     | 234334.354 | 0.013      |         |
| 26   | 0      | 26     |      | 25  | 0     | 25    |     | 235210.335 | -0.019     |         |
| 25   | 1      | 24     |      | 24  | 1     | 23    |     | 235470.342 | 0.003      |         |
| 25   | 2      | 23     |      | 24  | 2     | 22    |     | 237684.259 | -0.020     |         |
| 26   | 2      | 25     |      | 25  | 2     | 24    |     | 240446.461 | -0.026     |         |
| 26   | 13     | 14     |      | 25  | 13    | 13    |     | 242312.887 | -0.011     | -0.011  |
| 26   | 13     | 13     |      | 25  | 13    | 12    |     | 242312.887 | -0.011     | -0.011  |
| 26   | 12     | 14     |      | 25  | 12    | 13    |     | 242313.701 | 0.006      | 0.006   |
| 26   | 12     | 15     |      | 25  | 12    | 14    |     | 242313.701 | 0.006      | 0.006   |
| 26   | 14     | 12     |      | 25  | 14    | 11    |     | 242315.206 | -0.033     | -0.033  |
| 26   | 14     | 13     |      | 25  | 14    | 12    |     | 242315.206 | -0.033     | -0.033  |
| 26   | 11     | 15     |      | 25  | 11    | 14    |     | 242318.538 | 0.011      | 0.011   |
| 26   | 11     | 16     |      | 25  | 11    | 15    |     | 242318.538 | 0.011      | 0.011   |
| 26   | 15     | 11     |      | 25  | 15    | 10    |     | 242320.181 | 0.074      | 0.074   |
| 26   | 15     | 12     |      | 25  | 15    | 11    |     | 242320.181 | 0.074      | 0.074   |
| 26   | 10     | 16     |      | 25  | 10    | 15    |     | 242328.848 | 0.076      | 0.076   |
| 26   | 10     | 17     |      | 25  | 10    | 16    |     | 242328.848 | 0.076      | 0.076   |
| 26   | 9      | 18     |      | 25  | 9     | 17    |     | 242346.675 | 0.047      | 0.047   |
| 26   | 9      | 17     |      | 25  | 9     | 16    |     | 242346.675 | 0.047      | 0.047   |

*Continued on next page*

Table S6 – *Continued from previous page*

| $J'$ | $K'_a$ | $K'_c$ | $F'$ | $J$ | $K_a$ | $K_c$ | $F$ | Frequency  | Obs.-Calc. | Average |
|------|--------|--------|------|-----|-------|-------|-----|------------|------------|---------|
| 26   | 8      | 19     |      | 25  | 8     | 18    |     | 242375.797 | 0.001      | 0.001   |
| 26   | 8      | 18     |      | 25  | 8     | 17    |     | 242375.797 | 0.001      | 0.001   |
| 26   | 7      | 20     |      | 25  | 7     | 19    |     | 242422.954 | 0.046      | 0.045   |
| 26   | 7      | 19     |      | 25  | 7     | 18    |     | 242422.954 | 0.045      | 0.045   |
| 26   | 6      | 20     |      | 25  | 6     | 19    |     | 242500.859 | -0.106     | -0.063  |
| 26   | 6      | 21     |      | 25  | 6     | 20    |     | 242500.859 | -0.020     | -0.063  |
| 26   | 5      | 22     |      | 25  | 5     | 21    |     | 242636.244 | -0.022     |         |
| 26   | 5      | 21     |      | 25  | 5     | 20    |     | 242640.391 | 0.041      |         |
| 26   | 3      | 24     |      | 25  | 3     | 23    |     | 242758.805 | 0.027      |         |
| 26   | 4      | 23     |      | 25  | 4     | 22    |     | 242852.716 | 0.046      |         |
| 26   | 4      | 22     |      | 25  | 4     | 21    |     | 242968.595 | 0.003      |         |
| 27   | 1      | 27     |      | 26  | 1     | 26    |     | 243239.278 | -0.022     |         |
| 27   | 0      | 27     |      | 26  | 0     | 26    |     | 244017.126 | -0.101     |         |
| 26   | 3      | 23     |      | 25  | 3     | 22    |     | 244367.540 | 0.004      |         |
| 26   | 1      | 25     |      | 25  | 1     | 24    |     | 244572.611 | 0.050      |         |
| 26   | 2      | 24     |      | 25  | 2     | 23    |     | 247281.906 | -0.005     |         |
| 27   | 2      | 26     |      | 26  | 2     | 25    |     | 249555.684 | -0.002     |         |
| 27   | 13     | 14     |      | 26  | 13    | 13    |     | 251632.210 | 0.019      | 0.019   |
| 27   | 13     | 15     |      | 26  | 13    | 14    |     | 251632.210 | 0.019      | 0.019   |
| 27   | 12     | 16     |      | 26  | 12    | 15    |     | 251633.932 | 0.005      | 0.018   |
| 27   | 12     | 15     |      | 26  | 12    | 14    |     | 251633.932 | 0.005      | 0.018   |
| 27   | 14     | 14     |      | 26  | 14    | 13    |     | 251633.932 | 0.031      | 0.018   |
| 27   | 14     | 13     |      | 26  | 14    | 12    |     | 251633.932 | 0.031      | 0.018   |
| 27   | 15     | 12     |      | 26  | 15    | 11    |     | 251638.391 | 0.016      | 0.016   |
| 27   | 15     | 13     |      | 26  | 15    | 12    |     | 251638.391 | 0.016      | 0.016   |
| 27   | 11     | 16     |      | 26  | 11    | 15    |     | 251640.087 | -0.029     | -0.029  |
| 27   | 11     | 17     |      | 26  | 11    | 16    |     | 251640.087 | -0.029     | -0.029  |
| 27   | 16     | 11     |      | 26  | 16    | 10    |     | 251645.137 | -0.003     | -0.003  |
| 27   | 16     | 12     |      | 26  | 16    | 11    |     | 251645.137 | -0.003     | -0.003  |
| 27   | 10     | 18     |      | 26  | 10    | 17    |     | 251652.305 | 0.005      | 0.005   |
| 27   | 10     | 17     |      | 26  | 10    | 16    |     | 251652.305 | 0.005      | 0.005   |
| 27   | 17     | 10     |      | 26  | 17    | 9     |     | 251653.858 | 0.003      | 0.003   |
| 27   | 17     | 11     |      | 26  | 17    | 10    |     | 251653.858 | 0.003      | 0.003   |
| 27   | 18     | 9      |      | 26  | 18    | 8     |     | 251664.295 | 0.025      | 0.025   |
| 27   | 18     | 10     |      | 26  | 18    | 9     |     | 251664.295 | 0.025      | 0.025   |
| 27   | 9      | 18     |      | 26  | 9     | 17    |     | 251672.949 | 0.008      | 0.008   |
| 27   | 9      | 19     |      | 26  | 9     | 18    |     | 251672.949 | 0.008      | 0.008   |

*Continued on next page*

Table S6 – *Continued from previous page*

| $J'$ | $K'_a$ | $K'_c$ | $F'$ | $J$ | $K_a$ | $K_c$ | $F$ | Frequency  | Obs.-Calc. | Average |
|------|--------|--------|------|-----|-------|-------|-----|------------|------------|---------|
| 27   | 19     | 9      |      | 26  | 19    | 8     |     | 251676.198 | 0.000      | 0.000   |
| 27   | 19     | 8      |      | 26  | 19    | 7     |     | 251676.198 | 0.000      | 0.000   |
| 27   | 8      | 19     |      | 26  | 8     | 18    |     | 251706.188 | 0.002      | 0.002   |
| 27   | 8      | 20     |      | 26  | 8     | 19    |     | 251706.188 | 0.002      | 0.002   |
| 27   | 7      | 20     |      | 26  | 7     | 19    |     | 251759.467 | -0.005     | -0.004  |
| 27   | 7      | 21     |      | 26  | 7     | 20    |     | 251759.467 | -0.003     | -0.004  |
| 27   | 6      | 21     |      | 26  | 6     | 20    |     | 251847.325 | -0.071     | -0.005  |
| 27   | 6      | 22     |      | 26  | 6     | 21    |     | 251847.325 | 0.060      | -0.005  |
| 27   | 5      | 23     |      | 26  | 5     | 22    |     | 251998.916 | -0.008     |         |
| 27   | 5      | 22     |      | 26  | 5     | 21    |     | 252004.659 | -0.004     |         |
| 27   | 3      | 25     |      | 26  | 3     | 24    |     | 252084.107 | -0.015     |         |
| 28   | 1      | 28     |      | 27  | 1     | 27    |     | 252138.116 | -0.017     |         |
| 27   | 4      | 24     |      | 26  | 4     | 23    |     | 252233.303 | -0.011     |         |
| 27   | 4      | 23     |      | 26  | 4     | 22    |     | 252383.619 | -0.001     |         |
| 28   | 0      | 28     |      | 27  | 0     | 27    |     | 252825.490 | -0.015     |         |
| 27   | 1      | 26     |      | 26  | 1     | 25    |     | 253635.379 | -0.011     |         |
| 27   | 3      | 24     |      | 26  | 3     | 23    |     | 253987.816 | -0.006     |         |
| 27   | 2      | 25     |      | 26  | 2     | 24    |     | 256858.055 | 0.013      |         |
| 28   | 2      | 27     |      | 27  | 2     | 26    |     | 258651.140 | 0.000      |         |
| 28   | 13     | 16     |      | 27  | 13    | 15    |     | 260951.367 | -0.065     | -0.065  |
| 28   | 13     | 15     |      | 27  | 13    | 14    |     | 260951.367 | -0.065     | -0.065  |
| 28   | 12     | 16     |      | 27  | 12    | 15    |     | 260954.222 | 0.010      | 0.010   |
| 28   | 12     | 17     |      | 27  | 12    | 16    |     | 260954.222 | 0.010      | 0.010   |
| 28   | 15     | 14     |      | 27  | 15    | 13    |     | 260956.458 | 0.012      | 0.012   |
| 28   | 15     | 13     |      | 27  | 15    | 12    |     | 260956.458 | 0.012      | 0.012   |
| 28   | 16     | 13     |      | 27  | 16    | 12    |     | 260962.992 | 0.042      | 0.042   |
| 28   | 16     | 12     |      | 27  | 16    | 11    |     | 260962.992 | 0.042      | 0.042   |
| 28   | 17     | 12     |      | 27  | 17    | 11    |     | 260971.504 | -0.061     | -0.061  |
| 28   | 17     | 11     |      | 27  | 17    | 10    |     | 260971.504 | -0.061     | -0.061  |
| 28   | 10     | 19     |      | 27  | 10    | 18    |     | 260976.156 | -0.032     | -0.032  |
| 28   | 10     | 18     |      | 27  | 10    | 17    |     | 260976.156 | -0.032     | -0.032  |
| 28   | 18     | 11     |      | 27  | 18    | 10    |     | 260981.970 | -0.041     | -0.041  |
| 28   | 18     | 10     |      | 27  | 18    | 9     |     | 260981.970 | -0.041     | -0.041  |
| 28   | 9      | 20     |      | 27  | 9     | 19    |     | 260999.853 | 0.001      | 0.001   |
| 28   | 9      | 19     |      | 27  | 9     | 18    |     | 260999.853 | 0.001      | 0.001   |
| 29   | 1      | 29     |      | 28  | 1     | 28    |     | 261031.266 | -0.010     |         |
| 28   | 8      | 20     |      | 27  | 8     | 19    |     | 261037.507 | -0.002     | -0.002  |

*Continued on next page*

Table S6 – *Continued from previous page*

| $J'$ | $K'_a$ | $K'_c$ | $F'$ | $J$ | $K_a$ | $K_c$ | $F$ | Frequency  | Obs.-Calc. | Average |
|------|--------|--------|------|-----|-------|-------|-----|------------|------------|---------|
| 28   | 8      | 21     |      | 27  | 8     | 20    |     | 261037.507 | -0.002     | -0.002  |
| 28   | 7      | 22     |      | 27  | 7     | 21    |     | 261097.473 | 0.013      | 0.012   |
| 28   | 7      | 21     |      | 27  | 7     | 20    |     | 261097.473 | 0.010      | 0.012   |
| 28   | 6      | 23     |      | 27  | 6     | 22    |     | 261195.962 | 0.103      | 0.005   |
| 28   | 6      | 22     |      | 27  | 6     | 21    |     | 261195.962 | -0.093     | 0.005   |
| 28   | 5      | 24     |      | 27  | 5     | 23    |     | 261364.962 | 0.048      |         |
| 28   | 5      | 23     |      | 27  | 5     | 22    |     | 261372.852 | -0.024     |         |
| 28   | 3      | 26     |      | 27  | 3     | 25    |     | 261402.214 | 0.005      |         |
| 28   | 4      | 25     |      | 27  | 4     | 24    |     | 261616.581 | 0.030      |         |
| 28   | 3      | 25     |      | 27  | 3     | 24    |     | 263633.445 | 0.022      |         |
| 28   | 2      | 26     |      | 27  | 2     | 25    |     | 266410.203 | 0.002      |         |
| 29   | 2      | 28     |      | 28  | 2     | 27    |     | 267732.796 | -0.006     |         |
| 30   | 1      | 30     |      | 29  | 1     | 29    |     | 269919.160 | 0.004      |         |
| 29   | 13     | 16     |      | 28  | 13    | 15    |     | 270270.709 | 0.088      | 0.088   |
| 29   | 13     | 17     |      | 28  | 13    | 16    |     | 270270.709 | 0.088      | 0.088   |
| 29   | 12     | 18     |      | 28  | 12    | 17    |     | 270274.482 | -0.068     | -0.068  |
| 29   | 12     | 17     |      | 28  | 12    | 16    |     | 270274.482 | -0.068     | -0.068  |
| 29   | 11     | 18     |      | 28  | 11    | 17    |     | 270283.881 | 0.026      | 0.026   |
| 29   | 11     | 19     |      | 28  | 11    | 18    |     | 270283.881 | 0.026      | 0.026   |
| 29   | 10     | 19     |      | 28  | 10    | 18    |     | 270300.461 | 0.014      | 0.014   |
| 29   | 10     | 20     |      | 28  | 10    | 19    |     | 270300.461 | 0.014      | 0.014   |
| 29   | 9      | 20     |      | 28  | 9     | 19    |     | 270327.381 | -0.001     | -0.001  |
| 29   | 9      | 21     |      | 28  | 9     | 20    |     | 270327.381 | -0.001     | -0.001  |
| 29   | 8      | 21     |      | 28  | 8     | 20    |     | 270369.801 | 0.002      | 0.002   |
| 29   | 8      | 22     |      | 28  | 8     | 21    |     | 270369.801 | 0.002      | 0.002   |
| 29   | 7      | 23     |      | 28  | 7     | 22    |     | 270436.933 | -0.001     | -0.004  |
| 29   | 7      | 22     |      | 28  | 7     | 21    |     | 270436.933 | -0.006     | -0.004  |
| 30   | 0      | 30     |      | 29  | 0     | 29    |     | 270448.772 | -0.015     |         |
| 29   | 6      | 23     |      | 28  | 6     | 22    |     | 270546.904 | -0.132     | 0.012   |
| 29   | 6      | 24     |      | 28  | 6     | 23    |     | 270546.904 | 0.157      | 0.012   |
| 29   | 3      | 27     |      | 28  | 3     | 26    |     | 270712.166 | 0.014      |         |
| 29   | 5      | 25     |      | 28  | 5     | 24    |     | 270734.312 | -0.004     |         |
| 29   | 5      | 24     |      | 28  | 5     | 23    |     | 270745.232 | 0.005      |         |
| 29   | 4      | 26     |      | 28  | 4     | 25    |     | 271002.048 | 0.031      |         |
| 29   | 4      | 25     |      | 28  | 4     | 24    |     | 271247.005 | -0.019     |         |
| 29   | 3      | 26     |      | 28  | 3     | 25    |     | 273303.077 | -0.007     |         |
| 29   | 2      | 27     |      | 28  | 2     | 26    |     | 275936.148 | -0.011     |         |

*Continued on next page*

Table S6 – *Continued from previous page*

| $J'$ | $K'_a$ | $K'_c$ | $F'$ | $J$ | $K_a$ | $K_c$ | $F$ | Frequency  | Obs.-Calc. | Average |
|------|--------|--------|------|-----|-------|-------|-----|------------|------------|---------|
| 30   | 2      | 29     |      | 29  | 2     | 28    |     | 276800.673 | -0.013     |         |
| 31   | 1      | 31     |      | 30  | 1     | 30    |     | 278802.204 | 0.017      |         |
| 31   | 0      | 31     |      | 30  | 0     | 30    |     | 279264.391 | -0.021     |         |
| 30   | 13     | 17     |      | 29  | 13    | 16    |     | 279589.801 | 0.046      | 0.046   |
| 30   | 13     | 18     |      | 29  | 13    | 17    |     | 279589.801 | 0.046      | 0.046   |
| 30   | 15     | 15     |      | 29  | 15    | 14    |     | 279591.977 | 0.012      | 0.012   |
| 30   | 15     | 16     |      | 29  | 15    | 15    |     | 279591.977 | 0.012      | 0.012   |
| 30   | 12     | 19     |      | 29  | 12    | 18    |     | 279594.922 | -0.021     | -0.021  |
| 30   | 12     | 18     |      | 29  | 12    | 17    |     | 279594.922 | -0.021     | -0.021  |
| 30   | 16     | 14     |      | 29  | 16    | 13    |     | 279597.770 | -0.010     | -0.010  |
| 30   | 16     | 15     |      | 29  | 16    | 14    |     | 279597.770 | -0.010     | -0.010  |
| 30   | 11     | 19     |      | 29  | 11    | 18    |     | 279606.024 | 0.007      | 0.007   |
| 30   | 11     | 20     |      | 29  | 11    | 19    |     | 279606.024 | 0.007      | 0.007   |
| 30   | 18     | 12     |      | 29  | 18    | 11    |     | 279616.447 | 0.003      | 0.003   |
| 30   | 18     | 13     |      | 29  | 18    | 12    |     | 279616.447 | 0.003      | 0.003   |
| 30   | 10     | 20     |      | 29  | 10    | 19    |     | 279625.104 | 0.011      | 0.011   |
| 30   | 10     | 21     |      | 29  | 10    | 20    |     | 279625.104 | 0.011      | 0.011   |
| 30   | 19     | 12     |      | 29  | 19    | 11    |     | 279628.728 | 0.030      | 0.030   |
| 30   | 19     | 11     |      | 29  | 19    | 10    |     | 279628.728 | 0.030      | 0.030   |
| 30   | 20     | 10     |      | 29  | 20    | 9     |     | 279642.656 | 0.037      | 0.037   |
| 30   | 20     | 11     |      | 29  | 20    | 10    |     | 279642.656 | 0.037      | 0.037   |
| 30   | 9      | 21     |      | 29  | 9     | 20    |     | 279655.574 | 0.021      | 0.021   |
| 30   | 9      | 22     |      | 29  | 9     | 21    |     | 279655.574 | 0.021      | 0.021   |
| 30   | 8      | 22     |      | 29  | 8     | 21    |     | 279703.099 | 0.007      | 0.007   |
| 30   | 8      | 23     |      | 29  | 8     | 22    |     | 279703.099 | 0.007      | 0.007   |
| 30   | 7      | 24     |      | 29  | 7     | 23    |     | 279777.965 | 0.018      | 0.014   |
| 30   | 7      | 23     |      | 29  | 7     | 22    |     | 279777.965 | 0.010      | 0.014   |
| 30   | 6      | 24     |      | 29  | 6     | 23    |     | 279900.161 | -0.272     | -0.062  |
| 30   | 6      | 25     |      | 29  | 6     | 24    |     | 279900.161 | 0.149      | -0.062  |
| 30   | 3      | 28     |      | 29  | 3     | 27    |     | 280013.085 | -0.006     |         |
| 30   | 5      | 26     |      | 29  | 5     | 25    |     | 280107.191 | -0.002     |         |
| 30   | 5      | 25     |      | 29  | 5     | 24    |     | 280121.979 | 0.001      |         |
| 30   | 4      | 27     |      | 29  | 4     | 26    |     | 280389.332 | 0.044      |         |
| 30   | 1      | 29     |      | 29  | 1     | 28    |     | 280590.623 | -0.011     |         |
| 30   | 4      | 26     |      | 29  | 4     | 25    |     | 280697.658 | -0.008     |         |
| 30   | 3      | 27     |      | 29  | 3     | 26    |     | 282994.829 | 0.008      |         |
| 30   | 2      | 28     |      | 29  | 2     | 27    |     | 285433.872 | -0.001     |         |

*Continued on next page*



Table S6 – *Continued from previous page*

| $J'$ | $K'_a$ | $K'_c$ | $F'$ | $J$ | $K_a$ | $K_c$ | $F$ | Frequency  | Obs.-Calc. | Average |
|------|--------|--------|------|-----|-------|-------|-----|------------|------------|---------|
| 32   | 1      | 32     |      | 31  | 1     | 31    |     | 287680.798 | 0.036      |         |
| 32   | 0      | 32     |      | 31  | 0     | 31    |     | 288082.802 | 0.005      |         |
| 31   | 14     | 18     |      | 30  | 14    | 17    |     | 288907.229 | 0.053      | 0.053   |
| 31   | 14     | 17     |      | 30  | 14    | 16    |     | 288907.229 | 0.053      | 0.053   |
| 31   | 13     | 19     |      | 30  | 13    | 18    |     | 288908.844 | 0.013      | 0.013   |
| 31   | 13     | 18     |      | 30  | 13    | 17    |     | 288908.844 | 0.013      | 0.013   |
| 31   | 15     | 16     |      | 30  | 15    | 15    |     | 288909.432 | 0.034      | 0.034   |
| 31   | 15     | 17     |      | 30  | 15    | 16    |     | 288909.432 | 0.034      | 0.034   |
| 31   | 12     | 19     |      | 30  | 12    | 18    |     | 288915.360 | -0.033     | -0.033  |
| 31   | 12     | 20     |      | 30  | 12    | 19    |     | 288915.360 | -0.033     | -0.033  |
| 31   | 17     | 14     |      | 30  | 17    | 13    |     | 288922.833 | 0.023      | 0.023   |
| 31   | 17     | 15     |      | 30  | 17    | 14    |     | 288922.833 | 0.023      | 0.023   |
| 31   | 11     | 20     |      | 30  | 11    | 19    |     | 288928.396 | 0.013      | 0.013   |
| 31   | 11     | 21     |      | 30  | 11    | 20    |     | 288928.396 | 0.013      | 0.013   |
| 31   | 10     | 21     |      | 30  | 10    | 20    |     | 288950.137 | 0.001      | 0.001   |
| 31   | 10     | 22     |      | 30  | 10    | 21    |     | 288950.137 | 0.001      | 0.001   |
| 31   | 9      | 23     |      | 30  | 9     | 22    |     | 288984.389 | 0.003      | 0.003   |
| 31   | 9      | 22     |      | 30  | 9     | 21    |     | 288984.389 | 0.003      | 0.003   |
| 31   | 8      | 23     |      | 30  | 8     | 22    |     | 289037.412 | -0.009     | -0.008  |
| 31   | 8      | 24     |      | 30  | 8     | 23    |     | 289037.412 | -0.008     | -0.008  |
| 31   | 7      | 25     |      | 30  | 7     | 24    |     | 289120.553 | 0.000      | -0.006  |
| 31   | 7      | 24     |      | 30  | 7     | 23    |     | 289120.553 | -0.012     | -0.006  |
| 31   | 6      | 26     |      | 30  | 6     | 25    |     | 289255.824 | 0.087      |         |
| 31   | 6      | 25     |      | 30  | 6     | 24    |     | 289256.367 | 0.025      |         |
| 31   | 3      | 29     |      | 30  | 3     | 28    |     | 289304.214 | 0.021      |         |
| 31   | 5      | 27     |      | 30  | 5     | 26    |     | 289483.557 | -0.037     |         |
| 31   | 1      | 30     |      | 30  | 1     | 29    |     | 289502.520 | 0.064      |         |
| 31   | 4      | 27     |      | 30  | 4     | 26    |     | 290162.608 | 0.017      |         |
| 31   | 3      | 28     |      | 30  | 3     | 27    |     | 292705.882 | -0.034     |         |
| 32   | 2      | 31     |      | 31  | 2     | 30    |     | 294895.465 | -0.026     |         |
| 31   | 2      | 29     |      | 30  | 2     | 28    |     | 294901.414 | -0.014     |         |
| 33   | 1      | 33     |      | 32  | 1     | 32    |     | 296555.249 | -0.003     |         |
| 33   | 0      | 33     |      | 32  | 0     | 32    |     | 296903.846 | -0.014     |         |
| 32   | 14     | 18     |      | 31  | 14    | 17    |     | 298225.194 | 0.068      | 0.068   |
| 32   | 14     | 19     |      | 31  | 14    | 18    |     | 298225.194 | 0.068      | 0.068   |
| 32   | 15     | 18     |      | 31  | 15    | 17    |     | 298226.625 | 0.022      | 0.022   |
| 32   | 15     | 17     |      | 31  | 15    | 16    |     | 298226.625 | 0.022      | 0.022   |

*Continued on next page*

Table S6 – *Continued from previous page*

| $J'$ | $K'_a$ | $K'_c$ | $F'$ | $J$ | $K_a$ | $K_c$ | $F$ | Frequency  | Obs.-Calc. | Average |
|------|--------|--------|------|-----|-------|-------|-----|------------|------------|---------|
| 32   | 13     | 20     |      | 31  | 13    | 19    |     | 298227.871 | 0.023      | 0.023   |
| 32   | 13     | 19     |      | 31  | 13    | 18    |     | 298227.871 | 0.023      | 0.023   |
| 32   | 16     | 16     |      | 31  | 16    | 15    |     | 298231.494 | 0.004      | 0.004   |
| 32   | 16     | 17     |      | 31  | 16    | 16    |     | 298231.494 | 0.004      | 0.004   |
| 32   | 12     | 20     |      | 31  | 12    | 19    |     | 298235.887 | -0.014     | -0.014  |
| 32   | 12     | 21     |      | 31  | 12    | 20    |     | 298235.887 | -0.014     | -0.014  |
| 32   | 17     | 15     |      | 31  | 17    | 14    |     | 298239.256 | 0.030      | 0.030   |
| 32   | 17     | 16     |      | 31  | 17    | 15    |     | 298239.256 | 0.030      | 0.030   |
| 32   | 18     | 15     |      | 31  | 18    | 14    |     | 298249.385 | -0.011     | -0.011  |
| 32   | 18     | 14     |      | 31  | 18    | 13    |     | 298249.385 | -0.011     | -0.011  |
| 32   | 11     | 22     |      | 31  | 11    | 21    |     | 298250.942 | -0.017     | -0.017  |
| 32   | 11     | 21     |      | 31  | 11    | 20    |     | 298250.942 | -0.017     | -0.017  |
| 32   | 19     | 14     |      | 31  | 19    | 13    |     | 298261.720 | 0.027      | 0.027   |
| 32   | 19     | 13     |      | 31  | 19    | 12    |     | 298261.720 | 0.027      | 0.027   |
| 32   | 10     | 22     |      | 31  | 10    | 21    |     | 298275.591 | 0.000      | 0.000   |
| 32   | 10     | 23     |      | 31  | 10    | 22    |     | 298275.591 | 0.000      | 0.000   |
| 32   | 9      | 23     |      | 31  | 9     | 22    |     | 298313.903 | 0.000      | 0.000   |
| 32   | 9      | 24     |      | 31  | 9     | 23    |     | 298313.903 | 0.000      | 0.000   |
| 32   | 8      | 24     |      | 31  | 8     | 23    |     | 298372.821 | 0.000      | 0.000   |
| 32   | 8      | 25     |      | 31  | 8     | 24    |     | 298372.821 | 0.000      | 0.000   |
| 32   | 1      | 31     |      | 31  | 1     | 30    |     | 298381.644 | 0.033      |         |
| 32   | 7      | 26     |      | 31  | 7     | 25    |     | 298464.808 | 0.000      | -0.009  |
| 32   | 7      | 25     |      | 31  | 7     | 24    |     | 298464.808 | -0.018     | -0.009  |
| 32   | 3      | 30     |      | 31  | 3     | 29    |     | 298584.653 | -0.011     |         |
| 32   | 6      | 27     |      | 31  | 6     | 26    |     | 298613.964 | -0.042     |         |
| 32   | 6      | 26     |      | 31  | 6     | 25    |     | 298614.924 | 0.059      |         |
| 32   | 5      | 28     |      | 31  | 5     | 27    |     | 298863.518 | -0.032     |         |
| 32   | 5      | 27     |      | 31  | 5     | 26    |     | 298889.856 | -0.009     |         |
| 32   | 4      | 29     |      | 31  | 4     | 28    |     | 299167.246 | 0.022      |         |
| 32   | 4      | 28     |      | 31  | 4     | 27    |     | 299643.107 | -0.039     | -0.039  |
| 32   | 4      | 28     |      | 31  | 4     | 27    |     | 299643.107 | -0.039     | -0.039  |
| 32   | 3      | 29     |      | 31  | 3     | 28    |     | 302432.952 | -0.009     |         |
| 33   | 2      | 32     |      | 32  | 2     | 31    |     | 303922.747 | -0.005     |         |
| 32   | 2      | 30     |      | 31  | 2     | 29    |     | 304336.994 | 0.003      |         |
| 34   | 1      | 34     |      | 33  | 1     | 33    |     | 305426.014 | 0.008      |         |
| 34   | 0      | 34     |      | 33  | 0     | 33    |     | 305727.429 | -0.010     |         |
| 33   | 1      | 32     |      | 32  | 1     | 31    |     | 307231.359 | -0.012     |         |

*Continued on next page*

Table S6 – *Continued from previous page*

| $J'$ | $K'_a$ | $K'_c$ | $F'$ | $J$ | $K_a$ | $K_c$ | $F$ | Frequency  | Obs.-Calc. | Average |
|------|--------|--------|------|-----|-------|-------|-----|------------|------------|---------|
| 33   | 14     | 19     |      | 32  | 14    | 18    |     | 307542.970 | 0.052      | 0.052   |
| 33   | 14     | 20     |      | 32  | 14    | 19    |     | 307542.970 | 0.052      | 0.052   |
| 33   | 13     | 20     |      | 32  | 13    | 19    |     | 307546.720 | -0.083     | -0.083  |
| 33   | 13     | 21     |      | 32  | 13    | 20    |     | 307546.720 | -0.083     | -0.083  |
| 33   | 17     | 16     |      | 32  | 17    | 15    |     | 307555.269 | -0.021     | -0.021  |
| 33   | 17     | 17     |      | 32  | 17    | 16    |     | 307555.269 | -0.021     | -0.021  |
| 33   | 12     | 21     |      | 32  | 12    | 20    |     | 307556.479 | 0.010      | 0.010   |
| 33   | 12     | 22     |      | 32  | 12    | 21    |     | 307556.479 | 0.010      | 0.010   |
| 33   | 18     | 15     |      | 32  | 18    | 14    |     | 307565.222 | -0.063     | -0.063  |
| 33   | 18     | 16     |      | 32  | 18    | 15    |     | 307565.222 | -0.063     | -0.063  |
| 33   | 11     | 22     |      | 32  | 11    | 21    |     | 307573.776 | 0.024      | 0.024   |
| 33   | 11     | 23     |      | 32  | 11    | 22    |     | 307573.776 | 0.024      | 0.024   |
| 33   | 20     | 14     |      | 32  | 20    | 13    |     | 307591.785 | -0.039     | -0.039  |
| 33   | 20     | 13     |      | 32  | 20    | 12    |     | 307591.785 | -0.039     | -0.039  |
| 33   | 10     | 23     |      | 32  | 10    | 22    |     | 307601.471 | 0.002      | 0.002   |
| 33   | 10     | 24     |      | 32  | 10    | 23    |     | 307601.471 | 0.002      | 0.002   |
| 33   | 9      | 25     |      | 32  | 9     | 24    |     | 307644.137 | 0.010      | 0.010   |
| 33   | 9      | 24     |      | 32  | 9     | 23    |     | 307644.137 | 0.010      | 0.010   |
| 33   | 8      | 25     |      | 32  | 8     | 24    |     | 307709.341 | 0.011      | 0.012   |
| 33   | 8      | 26     |      | 32  | 8     | 25    |     | 307709.341 | 0.012      | 0.012   |
| 33   | 7      | 26     |      | 32  | 7     | 25    |     | 307810.780 | -0.014     | -0.001  |
| 33   | 7      | 27     |      | 32  | 7     | 26    |     | 307810.780 | 0.013      | -0.001  |
| 33   | 3      | 31     |      | 32  | 3     | 30    |     | 307853.756 | 0.004      |         |
| 33   | 6      | 28     |      | 32  | 6     | 27    |     | 307974.883 | -0.019     |         |
| 33   | 6      | 27     |      | 32  | 6     | 26    |     | 307976.128 | 0.021      |         |
| 33   | 5      | 28     |      | 32  | 5     | 27    |     | 308281.727 | 0.049      |         |
| 33   | 4      | 30     |      | 32  | 4     | 29    |     | 308556.647 | -0.083     | -0.083  |
| 33   | 4      | 30     |      | 32  | 4     | 29    |     | 308556.647 | -0.083     | -0.083  |
| 3    | 3      | 1      |      | 2   | 2     | 0     |     | 240565.232 | -0.027     |         |
| 3    | 3      | 0      |      | 2   | 2     | 1     |     | 240568.921 | -0.031     |         |
| 4    | 3      | 2      |      | 3   | 2     | 1     |     | 249874.680 | -0.019     |         |
| 4    | 3      | 1      |      | 3   | 2     | 2     |     | 249893.204 | 0.007      |         |
| 4    | 4      | 1      |      | 4   | 3     | 2     |     | 297628.441 | -0.032     | 0.033   |
| 4    | 4      | 0      |      | 4   | 3     | 1     |     | 297628.441 | 0.097      | 0.033   |
| 5    | 3      | 3      |      | 4   | 2     | 2     |     | 259170.071 | -0.026     |         |
| 5    | 3      | 2      |      | 4   | 2     | 3     |     | 259225.711 | 0.006      |         |
| 6    | 4      | 2      |      | 7   | 3     | 5     |     | 232372.985 | -0.015     |         |

*Continued on next page*

Table S6 – *Continued from previous page*

| $J'$ | $K'_a$ | $K'_c$ | $F'$ | $J$ | $K_a$ | $K_c$ | $F$ | Frequency  | Obs.-Calc. | Average |
|------|--------|--------|------|-----|-------|-------|-----|------------|------------|---------|
| 6    | 3      | 4      |      | 5   | 2     | 3     |     | 268441.328 | -0.013     |         |
| 6    | 3      | 3      |      | 5   | 2     | 4     |     | 268571.384 | 0.001      |         |
| 6    | 4      | 3      |      | 6   | 3     | 4     |     | 297618.263 | 0.020      |         |
| 7    | 3      | 5      |      | 6   | 2     | 4     |     | 277675.677 | 0.003      |         |
| 7    | 3      | 4      |      | 6   | 2     | 5     |     | 277936.315 | -0.033     |         |
| 7    | 4      | 3      |      | 7   | 3     | 4     |     | 297604.060 | -0.009     |         |
| 7    | 4      | 4      |      | 7   | 3     | 5     |     | 297607.927 | -0.008     |         |
| 8    | 3      | 6      |      | 7   | 2     | 5     |     | 286857.735 | -0.004     |         |
| 8    | 3      | 5      |      | 7   | 2     | 6     |     | 287327.969 | -0.015     |         |
| 8    | 4      | 4      |      | 8   | 3     | 5     |     | 297584.356 | 0.000      |         |
| 8    | 4      | 5      |      | 8   | 3     | 6     |     | 297592.840 | -0.008     |         |
| 9    | 3      | 7      |      | 8   | 2     | 6     |     | 295969.701 | -0.001     |         |
| 9    | 3      | 6      |      | 8   | 2     | 7     |     | 296755.007 | 0.002      |         |
| 9    | 4      | 5      |      | 9   | 3     | 6     |     | 297555.061 | -0.005     |         |
| 9    | 4      | 6      |      | 9   | 3     | 7     |     | 297572.018 | -0.001     |         |
| 10   | 5      | 6      |      | 11  | 4     | 7     |     | 280039.245 | 0.093      |         |
| 10   | 5      | 5      |      | 11  | 4     | 8     |     | 280039.552 | -0.096     |         |
| 10   | 4      | 6      |      | 10  | 3     | 7     |     | 297513.163 | 0.000      |         |
| 10   | 4      | 7      |      | 10  | 3     | 8     |     | 297544.558 | -0.023     |         |
| 10   | 3      | 8      |      | 9   | 2     | 7     |     | 304991.463 | 0.016      |         |
| 10   | 3      | 7      |      | 9   | 2     | 8     |     | 306227.513 | -0.017     |         |
| 11   | 5      | 7      |      | 12  | 4     | 8     |     | 270687.971 | -0.022     |         |
| 11   | 5      | 6      |      | 12  | 4     | 9     |     | 270689.042 | 0.056      |         |
| 11   | 4      | 7      |      | 11  | 3     | 8     |     | 297454.979 | -0.010     |         |
| 11   | 4      | 8      |      | 11  | 3     | 9     |     | 297509.822 | -0.011     |         |
| 12   | 5      | 7      |      | 13  | 4     | 10    |     | 261329.908 | -0.004     |         |
| 12   | 4      | 8      |      | 12  | 3     | 9     |     | 297376.164 | -0.007     |         |
| 12   | 4      | 9      |      | 12  | 3     | 10    |     | 297467.299 | -0.015     |         |
| 13   | 5      | 9      |      | 14  | 4     | 10    |     | 251957.819 | -0.010     |         |
| 13   | 5      | 8      |      | 14  | 4     | 11    |     | 251961.198 | -0.007     |         |
| 13   | 4      | 9      |      | 13  | 3     | 10    |     | 297271.535 | 0.003      |         |
| 13   | 4      | 10     |      | 13  | 3     | 11    |     | 297416.871 | -0.008     |         |
| 14   | 5      | 10     |      | 15  | 4     | 11    |     | 242575.778 | 0.010      |         |
| 14   | 5      | 9      |      | 15  | 4     | 12    |     | 242581.632 | 0.031      |         |
| 14   | 4      | 10     |      | 14  | 3     | 11    |     | 297135.002 | 0.005      |         |
| 14   | 4      | 11     |      | 14  | 3     | 12    |     | 297358.768 | -0.003     |         |
| 15   | 5      | 11     |      | 16  | 4     | 12    |     | 233180.095 | 0.013      |         |

*Continued on next page*

Table S6 – *Continued from previous page*

| $J'$ | $K'_a$ | $K'_c$ | $F'$ | $J$ | $K_a$ | $K_c$ | $F$ | Frequency  | Obs.-Calc. | Average |
|------|--------|--------|------|-----|-------|-------|-----|------------|------------|---------|
| 15   | 5      | 10     |      | 16  | 4     | 13    |     | 233189.794 | -0.010     |         |
| 15   | 4      | 11     |      | 15  | 3     | 12    |     | 296959.498 | 0.006      |         |
| 15   | 4      | 12     |      | 15  | 3     | 13    |     | 297293.688 | -0.012     |         |
| 16   | 4      | 12     |      | 16  | 3     | 13    |     | 296736.849 | -0.012     |         |
| 16   | 4      | 13     |      | 16  | 3     | 14    |     | 297222.916 | 0.005      |         |
| 17   | 4      | 13     |      | 17  | 3     | 14    |     | 296457.776 | -0.004     |         |
| 17   | 4      | 14     |      | 17  | 3     | 15    |     | 297148.252 | 0.001      |         |
| 18   | 6      | 13     |      | 19  | 5     | 14    |     | 290183.019 | 0.061      |         |
| 18   | 4      | 14     |      | 18  | 3     | 15    |     | 296111.709 | 0.013      |         |
| 18   | 4      | 15     |      | 18  | 3     | 16    |     | 297072.233 | 0.004      |         |
| 19   | 6      | 14     |      | 20  | 5     | 15    |     | 280788.772 | -0.008     |         |
| 19   | 6      | 13     |      | 20  | 5     | 16    |     | 280789.809 | 0.079      |         |
| 19   | 4      | 15     |      | 19  | 3     | 16    |     | 295686.780 | -0.006     |         |
| 20   | 6      | 14     |      | 21  | 5     | 17    |     | 271384.413 | 0.001      |         |
| 20   | 4      | 16     |      | 20  | 3     | 17    |     | 295169.972 | 0.013      |         |
| 20   | 4      | 17     |      | 20  | 3     | 18    |     | 296929.731 | 0.004      |         |
| 21   | 4      | 17     |      | 21  | 3     | 18    |     | 294546.905 | 0.000      |         |
| 21   | 4      | 18     |      | 21  | 3     | 19    |     | 296871.968 | 0.002      |         |
| 22   | 6      | 17     |      | 23  | 5     | 18    |     | 252531.096 | 0.000      |         |
| 22   | 6      | 16     |      | 23  | 5     | 19    |     | 252534.902 | -0.005     |         |
| 22   | 4      | 18     |      | 22  | 3     | 19    |     | 293802.230 | 0.025      |         |
| 22   | 4      | 19     |      | 22  | 3     | 20    |     | 296830.325 | 0.000      |         |
| 23   | 6      | 18     |      | 24  | 5     | 19    |     | 243082.667 | 0.001      |         |
| 23   | 6      | 17     |      | 24  | 5     | 20    |     | 243088.482 | 0.003      |         |
| 23   | 4      | 19     |      | 23  | 3     | 20    |     | 292919.538 | 0.013      |         |
| 23   | 4      | 20     |      | 23  | 3     | 21    |     | 296811.142 | 0.002      |         |
| 24   | 6      | 19     |      | 25  | 5     | 20    |     | 233617.369 | 0.022      |         |
| 24   | 6      | 18     |      | 25  | 5     | 21    |     | 233626.061 | -0.001     |         |
| 24   | 4      | 20     |      | 24  | 3     | 21    |     | 291881.925 | 0.032      |         |
| 25   | 1      | 25     |      | 24  | 0     | 24    |     | 233161.716 | 0.020      |         |
| 25   | 4      | 21     |      | 25  | 3     | 22    |     | 290672.120 | 0.029      |         |
| 25   | 4      | 22     |      | 25  | 3     | 23    |     | 296869.380 | 0.002      |         |
| 26   | 1      | 26     |      | 25  | 0     | 25    |     | 241092.202 | 0.010      |         |
| 27   | 0      | 27     |      | 26  | 1     | 26    |     | 238135.393 | 0.005      |         |
| 27   | 1      | 27     |      | 26  | 0     | 26    |     | 249121.136 | -0.003     |         |
| 27   | 7      | 21     |      | 28  | 6     | 22    |     | 290681.567 | 0.034      |         |
| 27   | 7      | 20     |      | 28  | 6     | 23    |     | 290682.025 | -0.070     |         |

*Continued on next page*

Table S6 – *Continued from previous page*

| $J'$ | $K'_a$ | $K'_c$ | $F'$ | $J$ | $K_a$ | $K_c$ | $F$ | Frequency  | Obs.-Calc. | Average |
|------|--------|--------|------|-----|-------|-------|-----|------------|------------|---------|
| 27   | 4      | 24     |      | 27  | 3     | 25    |     | 297112.459 | -0.002     |         |
| 28   | 0      | 28     |      | 27  | 1     | 27    |     | 247721.571 | -0.022     |         |
| 28   | 1      | 28     |      | 27  | 0     | 27    |     | 257242.041 | -0.003     |         |
| 28   | 7      | 22     |      | 29  | 6     | 23    |     | 281231.928 | -0.029     |         |
| 28   | 7      | 21     |      | 29  | 6     | 24    |     | 281232.846 | 0.035      |         |
| 28   | 4      | 25     |      | 28  | 3     | 26    |     | 297326.791 | -0.013     |         |
| 29   | 0      | 29     |      | 28  | 1     | 28    |     | 257219.336 | -0.008     |         |
| 29   | 1      | 29     |      | 28  | 0     | 28    |     | 265447.833 | 0.017      |         |
| 29   | 4      | 26     |      | 29  | 3     | 27    |     | 297616.686 | 0.017      |         |
| 30   | 7      | 23     |      | 31  | 6     | 26    |     | 262291.992 | 0.036      |         |
| 30   | 0      | 30     |      | 29  | 1     | 29    |     | 266636.846 | -0.009     |         |
| 30   | 1      | 30     |      | 29  | 0     | 29    |     | 273731.092 | 0.005      |         |
| 30   | 4      | 27     |      | 30  | 3     | 28    |     | 297992.880 | 0.014      |         |
| 31   | 7      | 25     |      | 32  | 6     | 26    |     | 252795.783 | 0.032      |         |
| 31   | 7      | 24     |      | 32  | 6     | 27    |     | 252798.539 | 0.024      |         |
| 31   | 0      | 31     |      | 30  | 1     | 30    |     | 275982.068 | -0.042     |         |
| 31   | 1      | 31     |      | 30  | 0     | 30    |     | 282084.476 | -0.012     |         |
| 32   | 7      | 26     |      | 33  | 6     | 27    |     | 243284.451 | -0.001     |         |
| 32   | 7      | 25     |      | 33  | 6     | 28    |     | 243288.403 | -0.036     |         |
| 32   | 0      | 32     |      | 31  | 1     | 31    |     | 285262.714 | -0.006     |         |
| 32   | 1      | 32     |      | 31  | 0     | 31    |     | 290500.844 | 0.006      |         |
| 33   | 7      | 27     |      | 34  | 6     | 28    |     | 233755.033 | -0.007     |         |
| 33   | 7      | 26     |      | 34  | 6     | 29    |     | 233760.747 | 0.018      |         |
| 33   | 0      | 33     |      | 32  | 1     | 32    |     | 294485.828 | 0.009      |         |
| 34   | 0      | 34     |      | 33  | 1     | 33    |     | 303658.007 | 0.001      |         |
| 34   | 1      | 34     |      | 33  | 0     | 33    |     | 307495.454 | 0.015      |         |
| 35   | 4      | 32     |      | 35  | 3     | 33    |     | 301565.532 | 0.004      |         |
| 35   | 0      | 35     |      | 34  | 1     | 34    |     | 312785.344 | 0.025      |         |
| 35   | 1      | 35     |      | 34  | 0     | 34    |     | 316061.363 | 0.018      |         |
| 36   | 8      | 29     |      | 37  | 7     | 30    |     | 290927.791 | 0.238      | 0.040   |
| 36   | 8      | 28     |      | 37  | 7     | 31    |     | 290927.791 | -0.158     | 0.040   |
| 36   | 4      | 33     |      | 36  | 3     | 34    |     | 302698.823 | -0.012     |         |
| 36   | 0      | 36     |      | 35  | 1     | 35    |     | 321873.241 | 0.012      |         |
| 36   | 1      | 36     |      | 35  | 0     | 35    |     | 324665.604 | 0.013      |         |
| 37   | 8      | 30     |      | 38  | 7     | 31    |     | 281426.447 | 0.038      |         |
| 37   | 8      | 29     |      | 38  | 7     | 32    |     | 281426.977 | -0.006     |         |
| 37   | 4      | 34     |      | 37  | 3     | 35    |     | 303998.020 | -0.015     |         |

*Continued on next page*

Table S6 – *Continued from previous page*

| $J'$ | $K'_a$ | $K'_c$ | $F'$ | $J$ | $K_a$ | $K_c$ | $F$ | Frequency  | Obs.-Calc. | Average |
|------|--------|--------|------|-----|-------|-------|-----|------------|------------|---------|
| 37   | 0      | 37     |      | 36  | 1     | 36    |     | 330926.611 | -0.043     |         |
| 38   | 8      | 30     |      | 39  | 7     | 33    |     | 271911.136 | -0.078     |         |
| 38   | 4      | 35     |      | 38  | 3     | 36    |     | 305473.813 | 0.001      |         |
| 38   | 0      | 38     |      | 37  | 1     | 37    |     | 339949.941 | -0.042     |         |
| 39   | 8      | 32     |      | 40  | 7     | 33    |     | 262378.762 | 0.073      |         |
| 39   | 8      | 31     |      | 40  | 7     | 34    |     | 262379.790 | -0.070     |         |
| 39   | 4      | 36     |      | 39  | 3     | 37    |     | 307136.396 | 0.013      |         |
| 40   | 8      | 33     |      | 41  | 7     | 34    |     | 252830.440 | -0.023     |         |
| 40   | 8      | 32     |      | 41  | 7     | 35    |     | 252832.131 | 0.018      |         |
| 41   | 8      | 33     |      | 42  | 7     | 36    |     | 243267.046 | -0.098     |         |
| 42   | 8      | 35     |      | 43  | 7     | 36    |     | 233680.911 | 0.003      |         |
| 42   | 8      | 34     |      | 43  | 7     | 37    |     | 233684.156 | 0.052      |         |
| 42   | 4      | 39     |      | 42  | 3     | 40    |     | 313338.203 | -0.001     |         |
| 43   | 4      | 40     |      | 43  | 3     | 41    |     | 315837.736 | -0.084     |         |
| 45   | 9      | 37     |      | 46  | 8     | 38    |     | 290985.575 | 0.128      | 0.010   |
| 45   | 9      | 36     |      | 46  | 8     | 39    |     | 290985.575 | -0.107     | 0.010   |
| 46   | 9      | 38     |      | 47  | 8     | 39    |     | 281439.916 | 0.151      | -0.014  |
| 46   | 9      | 37     |      | 47  | 8     | 40    |     | 281439.916 | -0.180     | -0.014  |
| 49   | 9      | 41     |      | 50  | 8     | 42    |     | 252709.327 | -0.024     |         |
| 49   | 9      | 40     |      | 50  | 8     | 43    |     | 252710.293 | 0.059      |         |
| 50   | 9      | 42     |      | 51  | 8     | 43    |     | 243099.076 | -0.011     |         |
| 50   | 9      | 41     |      | 51  | 8     | 44    |     | 243100.313 | 0.016      |         |
| 51   | 9      | 43     |      | 52  | 8     | 44    |     | 233470.809 | -0.060     |         |
| 51   | 9      | 42     |      | 52  | 8     | 45    |     | 233472.501 | -0.013     |         |
| 54   | 10     | 45     |      | 55  | 9     | 46    |     | 290916.199 | 0.057      | -0.007  |
| 54   | 10     | 44     |      | 55  | 9     | 47    |     | 290916.199 | -0.070     | -0.007  |
| 55   | 10     | 46     |      | 56  | 9     | 47    |     | 281333.976 | 0.114      | 0.027   |
| 55   | 10     | 45     |      | 56  | 9     | 48    |     | 281333.976 | -0.060     | 0.027   |
| 58   | 10     | 49     |      | 59  | 9     | 50    |     | 252495.392 | 0.139      | -0.081  |
| 58   | 10     | 48     |      | 59  | 9     | 51    |     | 252495.392 | -0.302     | -0.081  |
| 63   | 5      | 58     |      | 63  | 4     | 59    |     | 272565.643 | 0.039      |         |
| 65   | 5      | 60     |      | 65  | 4     | 61    |     | 267513.112 | 0.025      |         |
| 66   | 5      | 61     |      | 66  | 4     | 62    |     | 265832.688 | -0.005     |         |
| 67   | 5      | 62     |      | 67  | 4     | 63    |     | 264771.713 | 0.015      |         |
| 68   | 5      | 63     |      | 68  | 4     | 64    |     | 264366.191 | -0.001     |         |
| 69   | 5      | 64     |      | 69  | 4     | 65    |     | 264647.750 | 0.022      |         |
| 70   | 5      | 65     |      | 70  | 4     | 66    |     | 265643.279 | 0.003      |         |

*Continued on next page*

Table S6 – *Continued from previous page*

| $J'$ | $K'_a$ | $K'_c$ | $F'$ | $J$ | $K_a$ | $K_c$ | $F$ | Frequency  | Obs.-Calc. | Average |
|------|--------|--------|------|-----|-------|-------|-----|------------|------------|---------|
| 71   | 5      | 66     |      | 71  | 4     | 67    |     | 267375.229 | 0.027      |         |
| 73   | 5      | 68     |      | 73  | 4     | 69    |     | 273114.308 | 0.044      |         |
| 25   | 3      | 22     |      | 24  | 3     | 21    |     | 234773.132 | 0.000      |         |
| 5    | 4      | 2      |      | 6   | 3     | 3     |     | 241703.854 | -0.049     |         |
| 64   | 5      | 59     |      | 64  | 4     | 60    |     | 269772.379 | 0.042      |         |
| 8    | 5      | 3      |      | 9   | 4     | 6     |     | 298720.269 | -0.047     |         |
| 33   | 1      | 33     |      | 32  | 0     | 32    |     | 298973.284 | -0.010     |         |
| 32   | 4      | 29     |      | 32  | 3     | 30    |     | 299049.095 | -0.011     |         |
| 33   | 4      | 30     |      | 33  | 3     | 31    |     | 299752.081 | -0.003     |         |
| 26   | 7      | 19     |      | 27  | 6     | 22    |     | 300118.308 | -0.175     | 0.006   |
| 26   | 7      | 20     |      | 27  | 6     | 21    |     | 300118.308 | 0.188      | 0.006   |
| 35   | 8      | 27     |      | 36  | 7     | 30    |     | 300414.745 | -0.129     | 0.006   |
| 35   | 8      | 28     |      | 36  | 7     | 29    |     | 300414.745 | 0.141      | 0.006   |
| 53   | 10     | 43     |      | 54  | 9     | 46    |     | 300484.193 | 0.028      | 0.073   |
| 53   | 10     | 44     |      | 54  | 9     | 45    |     | 300484.193 | 0.119      | 0.073   |
| 44   | 9      | 35     |      | 45  | 8     | 38    |     | 300516.785 | -0.064     | 0.019   |
| 44   | 9      | 36     |      | 45  | 8     | 37    |     | 300516.785 | 0.102      | 0.019   |
| 34   | 4      | 31     |      | 34  | 3     | 32    |     | 300587.055 | -0.001     |         |
| 19   | 4      | 16     |      | 19  | 3     | 17    |     | 296998.094 | 0.029      |         |
| 40   | 4      | 37     |      | 40  | 3     | 38    |     | 308995.402 | -0.006     |         |
| 41   | 4      | 38     |      | 41  | 3     | 39    |     | 311059.898 | -0.013     |         |
| 10   | 2      | 8      | 9    | 9   | 1     | 9     | 8   | 232826.767 | 0.120      | 0.014   |
| 10   | 2      | 8      | 11   | 9   | 1     | 9     | 10  | 232826.767 | -0.091     | 0.014   |
| 10   | 2      | 8      | 10   | 9   | 1     | 9     | 9   | 232828.762 | -0.056     |         |
| 11   | 2      | 9      | 10   | 10  | 1     | 10    | 9   | 245228.086 | 0.065      | -0.035  |
| 11   | 2      | 9      | 12   | 10  | 1     | 10    | 11  | 245228.086 | -0.135     | -0.035  |
| 12   | 2      | 10     | 11   | 11  | 1     | 11    | 10  | 258090.874 | 0.122      | 0.027   |
| 12   | 2      | 10     | 13   | 11  | 1     | 11    | 12  | 258090.874 | -0.069     | 0.027   |
| 13   | 2      | 12     | 13   | 12  | 1     | 11    | 12  | 231058.739 | 0.026      |         |
| 13   | 2      | 12     | 12   | 12  | 1     | 11    | 11  | 231060.265 | -0.086     | -0.022  |
| 13   | 2      | 12     | 14   | 12  | 1     | 11    | 13  | 231060.265 | 0.042      | -0.022  |
| 13   | 2      | 11     | 13   | 12  | 1     | 12    | 12  | 271453.043 | -0.049     |         |
| 14   | 2      | 13     | 14   | 13  | 1     | 12    | 13  | 237498.142 | 0.073      |         |
| 14   | 2      | 13     | 13   | 13  | 1     | 12    | 12  | 237499.623 | -0.063     | -0.004  |
| 14   | 2      | 13     | 15   | 13  | 1     | 12    | 14  | 237499.623 | 0.054      | -0.004  |
| 14   | 2      | 12     | 13   | 13  | 1     | 13    | 12  | 285343.171 | 0.094      | 0.005   |
| 14   | 2      | 12     | 15   | 13  | 1     | 13    | 14  | 285343.171 | -0.084     | 0.005   |

*Continued on next page*



Table S6 – *Continued from previous page*

| $J'$ | $K'_a$ | $K'_c$ | $F'$ | $J$ | $K_a$ | $K_c$ | $F$ | Frequency  | Obs.-Calc. | Average |
|------|--------|--------|------|-----|-------|-------|-----|------------|------------|---------|
| 14   | 2      | 12     | 14   | 13  | 1     | 13    | 13  | 285345.601 | -0.038     |         |
| 16   | 2      | 15     | 16   | 15  | 1     | 14    | 15  | 249798.958 | 0.034      |         |
| 16   | 2      | 15     | 15   | 15  | 1     | 14    | 14  | 249800.443 | -0.052     | -0.003  |
| 16   | 2      | 15     | 17   | 15  | 1     | 14    | 16  | 249800.443 | 0.047      | -0.003  |
| 17   | 2      | 16     | 17   | 16  | 1     | 15    | 16  | 255678.098 | 0.013      |         |
| 17   | 2      | 16     | 16   | 16  | 1     | 15    | 15  | 255679.571 | -0.061     | -0.015  |
| 17   | 2      | 16     | 18   | 16  | 1     | 15    | 17  | 255679.571 | 0.031      | -0.015  |
| 19   | 2      | 18     | 19   | 18  | 1     | 17    | 18  | 266948.851 | 0.018      |         |
| 19   | 2      | 18     | 18   | 18  | 1     | 17    | 17  | 266950.287 | -0.038     | 0.001   |
| 19   | 2      | 18     | 20   | 18  | 1     | 17    | 19  | 266950.287 | 0.041      | 0.001   |
| 20   | 2      | 19     | 20   | 19  | 1     | 18    | 19  | 272367.223 | 0.013      |         |
| 20   | 2      | 19     | 19   | 19  | 1     | 18    | 18  | 272368.632 | -0.039     | -0.002  |
| 20   | 2      | 19     | 21   | 19  | 1     | 18    | 20  | 272368.632 | 0.035      | -0.002  |
| 21   | 2      | 20     | 21   | 20  | 1     | 19    | 20  | 277661.686 | 0.008      |         |
| 21   | 2      | 20     | 20   | 20  | 1     | 19    | 19  | 277663.030 | -0.073     | -0.039  |
| 21   | 2      | 20     | 22   | 20  | 1     | 19    | 21  | 277663.030 | -0.005     | -0.039  |
| 22   | 2      | 21     | 22   | 21  | 1     | 20    | 21  | 282850.032 | -0.007     |         |
| 22   | 2      | 21     | 21   | 21  | 1     | 20    | 20  | 282851.379 | -0.049     | -0.017  |
| 22   | 2      | 21     | 23   | 21  | 1     | 20    | 22  | 282851.379 | 0.015      | -0.017  |
| 23   | 2      | 22     | 23   | 22  | 1     | 21    | 22  | 287951.906 | 0.011      |         |
| 23   | 2      | 22     | 22   | 22  | 1     | 21    | 21  | 287953.198 | -0.045     | -0.015  |
| 23   | 2      | 22     | 24   | 22  | 1     | 21    | 23  | 287953.198 | 0.014      | -0.015  |
| 24   | 2      | 23     | 24   | 23  | 1     | 22    | 23  | 292988.582 | 0.026      |         |
| 24   | 2      | 23     | 23   | 23  | 1     | 22    | 22  | 292989.833 | -0.027     | 0.000   |
| 24   | 2      | 23     | 25   | 23  | 1     | 22    | 24  | 292989.833 | 0.027      | 0.000   |
| 25   | 2      | 24     | 25   | 24  | 1     | 23    | 24  | 297982.878 | -0.012     |         |
| 25   | 2      | 24     | 26   | 24  | 1     | 23    | 25  | 297984.121 | 0.024      | -0.001  |
| 25   | 2      | 24     | 24   | 24  | 1     | 23    | 23  | 297984.121 | -0.026     | -0.001  |
| 26   | 3      | 24     | 27   | 26  | 2     | 25    | 27  | 230449.367 | -0.029     | -0.017  |
| 26   | 3      | 24     | 25   | 26  | 2     | 25    | 25  | 230449.367 | -0.005     | -0.017  |
| 26   | 3      | 24     | 26   | 26  | 2     | 25    | 26  | 230450.101 | 0.083      |         |
| 26   | 4      | 22     | 27   | 26  | 3     | 23    | 27  | 289273.228 | -0.049     | -0.057  |
| 26   | 4      | 22     | 25   | 26  | 3     | 23    | 25  | 289273.228 | -0.064     | -0.057  |
| 26   | 4      | 23     | 27   | 26  | 3     | 24    | 27  | 296963.285 | 0.021      | 0.022   |
| 26   | 4      | 23     | 25   | 26  | 3     | 24    | 25  | 296963.285 | 0.022      | 0.022   |
| 27   | 3      | 25     | 28   | 27  | 2     | 26    | 28  | 232977.782 | -0.039     | -0.027  |
| 27   | 3      | 25     | 26   | 27  | 2     | 26    | 26  | 232977.782 | -0.014     | -0.027  |

*Continued on next page*

Table S6 – *Continued from previous page*

| $J'$ | $K'_a$ | $K'_c$ | $F'$ | $J$ | $K_a$ | $K_c$ | $F$ | Frequency  | Obs.-Calc. | Average |
|------|--------|--------|------|-----|-------|-------|-----|------------|------------|---------|
| 27   | 3      | 25     | 27   | 27  | 2     | 26    | 27  | 232978.555 | 0.077      |         |
| 27   | 4      | 23     | 28   | 27  | 3     | 24    | 28  | 287669.061 | -0.026     | -0.034  |
| 27   | 4      | 23     | 26   | 27  | 3     | 24    | 26  | 287669.061 | -0.042     | -0.034  |
| 27   | 2      | 26     | 27   | 26  | 1     | 25    | 26  | 307942.230 | 0.001      |         |
| 27   | 2      | 26     | 26   | 26  | 1     | 25    | 25  | 307943.363 | -0.019     | 0.002   |
| 27   | 2      | 26     | 28   | 26  | 1     | 25    | 27  | 307943.363 | 0.023      | 0.002   |
| 28   | 3      | 26     | 29   | 28  | 2     | 27    | 29  | 235728.840 | -0.039     | -0.026  |
| 28   | 3      | 26     | 27   | 28  | 2     | 27    | 27  | 235728.840 | -0.014     | -0.026  |
| 28   | 3      | 26     | 28   | 28  | 2     | 27    | 28  | 235729.629 | 0.061      |         |
| 28   | 4      | 24     | 29   | 28  | 3     | 25    | 29  | 285845.030 | -0.049     | -0.057  |
| 28   | 4      | 24     | 27   | 28  | 3     | 25    | 27  | 285845.030 | -0.066     | -0.057  |
| 28   | 2      | 27     | 28   | 27  | 1     | 26    | 27  | 312958.020 | 0.005      |         |
| 28   | 2      | 27     | 27   | 27  | 1     | 26    | 26  | 312959.098 | -0.014     | 0.005   |
| 28   | 2      | 27     | 29   | 27  | 1     | 26    | 28  | 312959.098 | 0.025      | 0.005   |
| 29   | 2      | 28     | 30   | 29  | 1     | 29    | 30  | 229872.057 | -0.010     | 0.017   |
| 29   | 2      | 28     | 28   | 29  | 1     | 29    | 28  | 229872.057 | 0.045      | 0.017   |
| 29   | 2      | 28     | 29   | 29  | 1     | 29    | 29  | 229873.668 | 0.004      |         |
| 29   | 3      | 27     | 30   | 29  | 2     | 28    | 30  | 238708.205 | -0.013     | 0.000   |
| 29   | 3      | 27     | 28   | 29  | 2     | 28    | 28  | 238708.205 | 0.012      | 0.000   |
| 29   | 4      | 25     | 30   | 29  | 3     | 26    | 30  | 283789.001 | -0.031     | -0.040  |
| 29   | 4      | 25     | 28   | 29  | 3     | 26    | 28  | 283789.001 | -0.049     | -0.040  |
| 30   | 1      | 29     | 29   | 29  | 2     | 28    | 28  | 234201.052 | 0.009      | -0.005  |
| 30   | 1      | 29     | 31   | 29  | 2     | 28    | 30  | 234201.052 | -0.019     | -0.005  |
| 30   | 1      | 29     | 30   | 29  | 2     | 28    | 29  | 234201.951 | 0.068      |         |
| 30   | 2      | 29     | 31   | 30  | 1     | 30    | 31  | 236753.578 | -0.023     | 0.004   |
| 30   | 2      | 29     | 29   | 30  | 1     | 30    | 29  | 236753.578 | 0.030      | 0.004   |
| 30   | 2      | 29     | 30   | 30  | 1     | 30    | 30  | 236755.196 | 0.010      |         |
| 30   | 3      | 28     | 31   | 30  | 2     | 29    | 31  | 241920.602 | -0.010     | 0.002   |
| 30   | 3      | 28     | 29   | 30  | 2     | 29    | 29  | 241920.602 | 0.015      | 0.002   |
| 30   | 3      | 28     | 30   | 30  | 2     | 29    | 30  | 241921.434 | 0.070      |         |
| 30   | 4      | 26     | 31   | 30  | 3     | 27    | 31  | 281491.913 | 0.024      | 0.014   |
| 30   | 4      | 26     | 29   | 30  | 3     | 27    | 29  | 281491.913 | 0.005      | 0.014   |
| 31   | 2      | 30     | 32   | 31  | 1     | 31    | 32  | 243806.278 | -0.009     | 0.016   |
| 31   | 2      | 30     | 30   | 31  | 1     | 31    | 30  | 243806.278 | 0.042      | 0.016   |
| 31   | 2      | 30     | 31   | 31  | 1     | 31    | 31  | 243807.844 | -0.015     |         |
| 31   | 1      | 30     | 30   | 30  | 2     | 29    | 29  | 246902.821 | -0.014     | -0.027  |
| 31   | 1      | 30     | 32   | 30  | 2     | 29    | 31  | 246902.821 | -0.039     | -0.027  |

*Continued on next page*

Table S6 – *Continued from previous page*

| $J'$ | $K'_a$ | $K'_c$ | $F'$ | $J$ | $K_a$ | $K_c$ | $F$ | Frequency  | Obs.-Calc. | Average |
|------|--------|--------|------|-----|-------|-------|-----|------------|------------|---------|
| 31   | 1      | 30     | 31   | 30  | 2     | 29    | 30  | 246903.614 | 0.002      |         |
| 31   | 4      | 27     | 31   | 31  | 3     | 28    | 31  | 278947.942 | -0.039     |         |
| 31   | 4      | 27     | 32   | 31  | 3     | 28    | 32  | 278948.580 | 0.003      | -0.006  |
| 31   | 4      | 27     | 30   | 31  | 3     | 28    | 30  | 278948.580 | -0.016     | -0.006  |
| 32   | 3      | 30     | 33   | 32  | 2     | 31    | 33  | 249059.053 | -0.036     | -0.024  |
| 32   | 3      | 30     | 31   | 32  | 2     | 31    | 31  | 249059.053 | -0.011     | -0.024  |
| 32   | 3      | 30     | 32   | 32  | 2     | 31    | 32  | 249059.947 | 0.048      |         |
| 32   | 2      | 31     | 33   | 32  | 1     | 32    | 33  | 251020.985 | -0.036     | -0.011  |
| 32   | 2      | 31     | 31   | 32  | 1     | 32    | 31  | 251020.985 | 0.013      | -0.011  |
| 32   | 2      | 31     | 32   | 32  | 1     | 32    | 32  | 251022.568 | -0.011     |         |
| 32   | 1      | 31     | 31   | 31  | 2     | 30    | 30  | 259429.579 | -0.019     | -0.030  |
| 32   | 1      | 31     | 33   | 31  | 2     | 30    | 32  | 259429.579 | -0.041     | -0.030  |
| 32   | 1      | 31     | 32   | 31  | 2     | 30    | 31  | 259430.386 | 0.074      |         |
| 32   | 4      | 28     | 32   | 32  | 3     | 29    | 32  | 276158.084 | -0.059     |         |
| 32   | 4      | 28     | 33   | 32  | 3     | 29    | 33  | 276158.770 | -0.004     | -0.013  |
| 32   | 4      | 28     | 31   | 32  | 3     | 29    | 31  | 276158.770 | -0.023     | -0.013  |
| 33   | 3      | 31     | 34   | 33  | 2     | 32    | 34  | 252990.057 | -0.023     | -0.011  |
| 33   | 3      | 31     | 32   | 33  | 2     | 32    | 32  | 252990.057 | 0.002      | -0.011  |
| 33   | 3      | 31     | 33   | 33  | 2     | 32    | 33  | 252990.937 | 0.020      |         |
| 33   | 2      | 32     | 34   | 33  | 1     | 33    | 34  | 258388.516 | -0.009     | 0.015   |
| 33   | 2      | 32     | 32   | 33  | 1     | 33    | 32  | 258388.516 | 0.038      | 0.015   |
| 33   | 2      | 32     | 33   | 33  | 1     | 33    | 33  | 258390.065 | -0.004     |         |
| 33   | 4      | 29     | 33   | 33  | 3     | 30    | 33  | 273126.839 | -0.069     |         |
| 33   | 4      | 29     | 34   | 33  | 3     | 30    | 34  | 273127.605 | 0.037      | 0.027   |
| 33   | 4      | 29     | 32   | 33  | 3     | 30    | 32  | 273127.605 | 0.017      | 0.027   |
| 34   | 1      | 33     | 35   | 34  | 0     | 34    | 35  | 238628.771 | 0.019      | 0.050   |
| 34   | 1      | 33     | 33   | 34  | 0     | 34    | 33  | 238628.771 | 0.081      | 0.050   |
| 34   | 3      | 32     | 35   | 34  | 2     | 33    | 35  | 257163.890 | -0.024     | -0.011  |
| 34   | 3      | 32     | 33   | 34  | 2     | 33    | 33  | 257163.890 | 0.001      | -0.011  |
| 34   | 3      | 32     | 34   | 34  | 2     | 33    | 34  | 257164.817 | 0.042      |         |
| 34   | 2      | 33     | 35   | 34  | 1     | 34    | 35  | 265899.437 | 0.003      | 0.026   |
| 34   | 2      | 33     | 33   | 34  | 1     | 34    | 33  | 265899.437 | 0.048      | 0.026   |
| 34   | 2      | 33     | 34   | 34  | 1     | 34    | 34  | 265900.944 | -0.018     |         |
| 34   | 4      | 30     | 34   | 34  | 3     | 31    | 34  | 269865.223 | -0.062     |         |
| 34   | 4      | 30     | 35   | 34  | 3     | 31    | 35  | 269866.008 | 0.037      | 0.026   |
| 34   | 4      | 30     | 33   | 34  | 3     | 31    | 33  | 269866.008 | 0.016      | 0.026   |
| 34   | 1      | 33     | 33   | 33  | 2     | 32    | 32  | 283898.205 | 0.000      | -0.008  |

*Continued on next page*

Table S6 – *Continued from previous page*

| $J'$ | $K'_a$ | $K'_c$ | $F'$ | $J$ | $K_a$ | $K_c$ | $F$ | Frequency  | Obs.-Calc. | Average |
|------|--------|--------|------|-----|-------|-------|-----|------------|------------|---------|
| 34   | 1      | 33     | 35   | 33  | 2     | 32    | 34  | 283898.205 | -0.017     | -0.008  |
| 34   | 1      | 33     | 34   | 33  | 2     | 32    | 33  | 283898.808 | 0.014      |         |
| 35   | 1      | 34     | 36   | 35  | 0     | 35    | 36  | 248933.176 | -0.046     | -0.017  |
| 35   | 1      | 34     | 34   | 35  | 0     | 35    | 34  | 248933.176 | 0.012      | -0.017  |
| 35   | 1      | 34     | 35   | 35  | 0     | 35    | 35  | 248935.207 | -0.033     |         |
| 35   | 3      | 33     | 36   | 35  | 2     | 34    | 36  | 261580.584 | -0.052     | -0.040  |
| 35   | 3      | 33     | 34   | 35  | 2     | 34    | 34  | 261580.584 | -0.027     | -0.040  |
| 35   | 3      | 33     | 35   | 35  | 2     | 34    | 35  | 261581.558 | 0.036      |         |
| 35   | 4      | 31     | 35   | 35  | 3     | 32    | 35  | 266390.451 | -0.068     |         |
| 35   | 4      | 31     | 36   | 35  | 3     | 32    | 36  | 266391.271 | 0.045      | 0.035   |
| 35   | 4      | 31     | 34   | 35  | 3     | 32    | 34  | 266391.271 | 0.025      | 0.035   |
| 35   | 2      | 34     | 36   | 35  | 1     | 35    | 36  | 273544.353 | -0.022     | 0.000   |
| 35   | 2      | 34     | 34   | 35  | 1     | 35    | 34  | 273544.353 | 0.022      | 0.000   |
| 35   | 2      | 34     | 35   | 35  | 1     | 35    | 35  | 273545.848 | -0.038     |         |
| 35   | 1      | 34     | 34   | 34  | 2     | 33    | 33  | 295819.142 | 0.059      | 0.051   |
| 35   | 1      | 34     | 36   | 34  | 2     | 33    | 35  | 295819.142 | 0.043      | 0.051   |
| 36   | 1      | 35     | 37   | 36  | 0     | 36    | 37  | 259194.402 | -0.006     | 0.022   |
| 36   | 1      | 35     | 35   | 36  | 0     | 36    | 35  | 259194.402 | 0.049      | 0.022   |
| 36   | 1      | 35     | 36   | 36  | 0     | 36    | 36  | 259196.333 | -0.028     |         |
| 36   | 4      | 32     | 36   | 36  | 3     | 33    | 36  | 262726.132 | -0.054     |         |
| 36   | 4      | 32     | 37   | 36  | 3     | 33    | 37  | 262726.947 | 0.038      | 0.028   |
| 36   | 4      | 32     | 35   | 36  | 3     | 33    | 35  | 262726.947 | 0.018      | 0.028   |
| 36   | 3      | 34     | 37   | 36  | 2     | 35    | 37  | 266239.310 | -0.026     | -0.013  |
| 36   | 3      | 34     | 35   | 36  | 2     | 35    | 35  | 266239.310 | -0.001     | -0.013  |
| 36   | 2      | 35     | 37   | 36  | 1     | 36    | 37  | 281314.040 | -0.002     | 0.019   |
| 36   | 2      | 35     | 35   | 36  | 1     | 36    | 35  | 281314.040 | 0.040      | 0.019   |
| 36   | 2      | 35     | 36   | 36  | 1     | 36    | 36  | 281315.515 | -0.021     |         |
| 36   | 1      | 35     | 35   | 35  | 2     | 34    | 34  | 307523.306 | 0.063      | 0.056   |
| 36   | 1      | 35     | 37   | 35  | 2     | 34    | 36  | 307523.306 | 0.050      | 0.056   |
| 37   | 2      | 35     | 36   | 36  | 3     | 34    | 35  | 234097.294 | -0.001     | -0.017  |
| 37   | 2      | 35     | 38   | 36  | 3     | 34    | 37  | 234097.294 | -0.032     | -0.017  |
| 37   | 2      | 35     | 37   | 36  | 3     | 34    | 36  | 234098.503 | 0.044      |         |
| 37   | 4      | 33     | 37   | 37  | 3     | 34    | 37  | 258902.014 | -0.069     |         |
| 37   | 4      | 33     | 38   | 37  | 3     | 34    | 38  | 258902.858 | 0.046      | 0.036   |
| 37   | 4      | 33     | 36   | 37  | 3     | 34    | 36  | 258902.858 | 0.026      | 0.036   |
| 37   | 1      | 36     | 38   | 37  | 0     | 37    | 38  | 269396.802 | 0.005      | 0.031   |
| 37   | 1      | 36     | 36   | 37  | 0     | 37    | 36  | 269396.802 | 0.056      | 0.031   |

*Continued on next page*

Table S6 – *Continued from previous page*

| $J'$ | $K'_a$ | $K'_c$ | $F'$ | $J$ | $K_a$ | $K_c$ | $F$ | Frequency  | Obs.-Calc. | Average |
|------|--------|--------|------|-----|-------|-------|-----|------------|------------|---------|
| 37   | 1      | 36     | 37   | 37  | 0     | 37    | 37  | 269398.662 | -0.026     |         |
| 37   | 3      | 35     | 38   | 37  | 2     | 36    | 38  | 271138.109 | -0.045     | -0.033  |
| 37   | 3      | 35     | 36   | 37  | 2     | 36    | 36  | 271138.109 | -0.021     | -0.033  |
| 37   | 2      | 36     | 38   | 37  | 1     | 37    | 38  | 289199.295 | 0.025      | 0.045   |
| 37   | 2      | 36     | 36   | 37  | 1     | 37    | 36  | 289199.295 | 0.065      | 0.045   |
| 37   | 2      | 36     | 37   | 37  | 1     | 37    | 37  | 289200.741 | -0.004     |         |
| 37   | 1      | 36     | 36   | 36  | 2     | 35    | 35  | 319009.503 | 0.109      | 0.103   |
| 37   | 1      | 36     | 38   | 36  | 2     | 35    | 37  | 319009.503 | 0.097      | 0.103   |
| 38   | 2      | 36     | 37   | 37  | 3     | 35    | 36  | 249476.420 | 0.005      | -0.009  |
| 38   | 2      | 36     | 39   | 37  | 3     | 35    | 38  | 249476.420 | -0.024     | -0.009  |
| 38   | 2      | 36     | 38   | 37  | 3     | 35    | 37  | 249477.544 | -0.001     |         |
| 38   | 4      | 34     | 38   | 38  | 3     | 35    | 38  | 254953.833 | -0.055     |         |
| 38   | 4      | 34     | 39   | 38  | 3     | 35    | 39  | 254954.668 | 0.050      | 0.040   |
| 38   | 4      | 34     | 37   | 38  | 3     | 35    | 37  | 254954.668 | 0.031      | 0.040   |
| 38   | 3      | 36     | 39   | 38  | 2     | 37    | 39  | 276274.284 | -0.022     | -0.009  |
| 38   | 3      | 36     | 37   | 38  | 2     | 37    | 37  | 276274.284 | 0.003      | -0.009  |
| 38   | 3      | 36     | 38   | 38  | 2     | 37    | 38  | 276275.308 | 0.054      |         |
| 38   | 1      | 37     | 39   | 38  | 0     | 38    | 39  | 279528.884 | 0.013      | 0.037   |
| 38   | 1      | 37     | 37   | 38  | 0     | 38    | 37  | 279528.884 | 0.061      | 0.037   |
| 38   | 1      | 37     | 38   | 38  | 0     | 38    | 38  | 279530.688 | -0.012     |         |
| 38   | 2      | 37     | 39   | 38  | 1     | 38    | 39  | 297191.118 | 0.017      | 0.036   |
| 38   | 2      | 37     | 37   | 38  | 1     | 38    | 37  | 297191.118 | 0.055      | 0.036   |
| 38   | 2      | 37     | 38   | 38  | 1     | 38    | 38  | 297192.553 | -0.005     |         |
| 39   | 4      | 35     | 39   | 39  | 3     | 36    | 39  | 250922.592 | -0.058     |         |
| 39   | 4      | 35     | 40   | 39  | 3     | 36    | 40  | 250923.418 | 0.045      | 0.036   |
| 39   | 4      | 35     | 38   | 39  | 3     | 36    | 38  | 250923.418 | 0.027      | 0.036   |
| 39   | 2      | 37     | 38   | 38  | 3     | 36    | 37  | 264817.876 | -0.003     | -0.016  |
| 39   | 2      | 37     | 40   | 38  | 3     | 36    | 39  | 264817.876 | -0.030     | -0.016  |
| 39   | 2      | 37     | 39   | 38  | 3     | 36    | 38  | 264818.975 | 0.005      |         |
| 39   | 3      | 37     | 40   | 39  | 2     | 38    | 40  | 281644.113 | -0.004     | 0.009   |
| 39   | 3      | 37     | 38   | 39  | 2     | 38    | 38  | 281644.113 | 0.021      | 0.009   |
| 39   | 3      | 37     | 39   | 39  | 2     | 38    | 39  | 281645.117 | 0.035      |         |
| 39   | 1      | 38     | 40   | 39  | 0     | 39    | 40  | 289582.717 | -0.028     | -0.005  |
| 39   | 1      | 38     | 38   | 39  | 0     | 39    | 38  | 289582.717 | 0.018      | -0.005  |
| 39   | 1      | 38     | 39   | 39  | 0     | 39    | 39  | 289584.492 | -0.022     |         |
| 39   | 2      | 38     | 40   | 39  | 1     | 39    | 40  | 305280.855 | 0.013      | 0.032   |
| 39   | 2      | 38     | 38   | 39  | 1     | 39    | 38  | 305280.855 | 0.050      | 0.032   |

*Continued on next page*

Table S6 – *Continued from previous page*

| $J'$ | $K'_a$ | $K'_c$ | $F'$ | $J$ | $K_a$ | $K_c$ | $F$ | Frequency  | Obs.-Calc. | Average |
|------|--------|--------|------|-----|-------|-------|-----|------------|------------|---------|
| 39   | 2      | 38     | 39   | 39  | 1     | 39    | 39  | 305282.285 | 0.006      |         |
| 40   | 4      | 36     | 40   | 40  | 3     | 37    | 40  | 246854.040 | -0.069     |         |
| 40   | 4      | 36     | 41   | 40  | 3     | 37    | 41  | 246854.876 | 0.061      | 0.052   |
| 40   | 4      | 36     | 39   | 40  | 3     | 37    | 39  | 246854.876 | 0.043      | 0.052   |
| 40   | 3      | 38     | 41   | 40  | 2     | 39    | 41  | 287243.063 | 0.009      | 0.021   |
| 40   | 3      | 38     | 39   | 40  | 2     | 39    | 39  | 287243.063 | 0.033      | 0.021   |
| 40   | 3      | 38     | 40   | 40  | 2     | 39    | 40  | 287244.033 | -0.002     |         |
| 40   | 2      | 38     | 41   | 39  | 3     | 37    | 40  | 280092.618 | -0.015     | -0.002  |
| 40   | 2      | 38     | 39   | 39  | 3     | 37    | 38  | 280092.618 | 0.010      | -0.002  |
| 40   | 2      | 38     | 40   | 39  | 3     | 37    | 39  | 280093.668 | 0.009      |         |
| 41   | 4      | 37     | 41   | 41  | 3     | 38    | 41  | 242797.820 | -0.067     |         |
| 41   | 4      | 37     | 40   | 41  | 3     | 38    | 40  | 242798.609 | 0.022      |         |
| 41   | 4      | 37     | 42   | 41  | 3     | 38    | 42  | 242798.613 | 0.043      |         |
| 41   | 3      | 39     | 42   | 41  | 2     | 40    | 42  | 293065.768 | -0.017     | -0.005  |
| 41   | 3      | 39     | 40   | 41  | 2     | 40    | 40  | 293065.768 | 0.007      | -0.005  |
| 41   | 3      | 39     | 41   | 41  | 2     | 40    | 41  | 293066.776 | -0.004     |         |
| 41   | 2      | 39     | 40   | 40  | 3     | 38    | 39  | 295271.368 | -0.008     | -0.020  |
| 41   | 2      | 39     | 42   | 40  | 3     | 38    | 41  | 295271.368 | -0.032     | -0.020  |
| 41   | 2      | 39     | 41   | 40  | 3     | 38    | 40  | 295272.402 | 0.018      |         |
| 41   | 1      | 40     | 42   | 41  | 0     | 41    | 42  | 309439.797 | -0.032     | -0.011  |
| 41   | 1      | 40     | 40   | 41  | 0     | 41    | 40  | 309439.797 | 0.009      | -0.011  |
| 41   | 1      | 40     | 41   | 41  | 0     | 41    | 41  | 309441.530 | 0.044      |         |
| 42   | 2      | 40     | 43   | 42  | 1     | 41    | 43  | 230057.052 | -0.001     | 0.021   |
| 42   | 2      | 40     | 41   | 42  | 1     | 41    | 41  | 230057.052 | 0.042      | 0.021   |
| 42   | 2      | 40     | 42   | 42  | 1     | 41    | 42  | 230058.741 | -0.039     |         |
| 42   | 4      | 38     | 42   | 42  | 3     | 39    | 42  | 238806.605 | 0.007      |         |
| 42   | 4      | 38     | 43   | 42  | 3     | 39    | 43  | 238807.256 | 0.005      | -0.003  |
| 42   | 4      | 38     | 41   | 42  | 3     | 39    | 41  | 238807.256 | -0.010     | -0.003  |
| 42   | 2      | 40     | 41   | 41  | 3     | 39    | 40  | 310325.166 | -0.040     | -0.051  |
| 42   | 2      | 40     | 43   | 41  | 3     | 39    | 42  | 310325.166 | -0.063     | -0.051  |
| 43   | 4      | 39     | 43   | 43  | 3     | 40    | 43  | 234934.895 | -0.001     |         |
| 43   | 4      | 39     | 44   | 43  | 3     | 40    | 44  | 234935.534 | 0.023      | 0.016   |
| 43   | 4      | 39     | 42   | 43  | 3     | 40    | 42  | 234935.534 | 0.009      | 0.016   |
| 43   | 2      | 41     | 44   | 43  | 1     | 42    | 44  | 240691.343 | -0.027     | -0.007  |
| 43   | 2      | 41     | 42   | 43  | 1     | 42    | 42  | 240691.343 | 0.013      | -0.007  |
| 43   | 2      | 41     | 43   | 43  | 1     | 42    | 43  | 240693.085 | -0.009     |         |
| 43   | 3      | 41     | 44   | 43  | 2     | 42    | 44  | 305357.591 | -0.016     | -0.004  |

*Continued on next page*

Table S6 – *Continued from previous page*

| $J'$ | $K'_a$ | $K'_c$ | $F'$ | $J$ | $K_a$ | $K_c$ | $F$ | Frequency  | Obs.-Calc. | Average |
|------|--------|--------|------|-----|-------|-------|-----|------------|------------|---------|
| 43   | 3      | 41     | 42   | 43  | 2     | 42    | 42  | 305357.591 | 0.008      | -0.004  |
| 43   | 3      | 41     | 43   | 43  | 2     | 42    | 43  | 305358.655 | 0.030      |         |
| 44   | 4      | 40     | 44   | 44  | 3     | 41    | 44  | 231238.412 | -0.084     |         |
| 44   | 4      | 40     | 45   | 44  | 3     | 41    | 45  | 231239.086 | 0.021      | 0.014   |
| 44   | 4      | 40     | 43   | 44  | 3     | 41    | 43  | 231239.086 | 0.008      | 0.014   |
| 44   | 2      | 42     | 45   | 44  | 1     | 43    | 45  | 251515.373 | -0.003     | 0.017   |
| 44   | 2      | 42     | 43   | 44  | 1     | 43    | 43  | 251515.373 | 0.036      | 0.017   |
| 44   | 2      | 42     | 44   | 44  | 1     | 43    | 44  | 251517.076 | -0.012     |         |
| 44   | 3      | 42     | 45   | 44  | 2     | 43    | 45  | 311812.478 | -0.066     | -0.054  |
| 44   | 3      | 42     | 43   | 44  | 2     | 43    | 43  | 311812.478 | -0.043     | -0.054  |
| 44   | 3      | 42     | 44   | 44  | 2     | 43    | 44  | 311813.611 | 0.040      |         |
| 45   | 2      | 43     | 46   | 45  | 1     | 44    | 46  | 262483.769 | -0.063     | -0.044  |
| 45   | 2      | 43     | 44   | 45  | 1     | 44    | 44  | 262483.769 | -0.025     | -0.044  |
| 45   | 2      | 43     | 45   | 45  | 1     | 44    | 45  | 262485.441 | -0.085     |         |
| 45   | 4      | 42     | 46   | 45  | 3     | 43    | 46  | 321526.728 | -0.040     | -0.034  |
| 45   | 4      | 42     | 44   | 45  | 3     | 43    | 44  | 321526.728 | -0.029     | -0.034  |
| 46   | 3      | 43     | 45   | 45  | 4     | 42    | 44  | 237150.953 | -0.047     | -0.059  |
| 46   | 3      | 43     | 47   | 45  | 4     | 42    | 46  | 237150.953 | -0.072     | -0.059  |
| 46   | 3      | 43     | 46   | 45  | 4     | 42    | 45  | 237152.238 | 0.064      |         |
| 46   | 2      | 44     | 47   | 46  | 1     | 45    | 47  | 273553.439 | 0.006      | 0.024   |
| 46   | 2      | 44     | 45   | 46  | 1     | 45    | 45  | 273553.439 | 0.042      | 0.024   |
| 46   | 2      | 44     | 46   | 46  | 1     | 45    | 46  | 273555.079 | -0.024     |         |
| 47   | 3      | 44     | 46   | 46  | 4     | 43    | 45  | 254160.193 | -0.045     | -0.057  |
| 47   | 3      | 44     | 48   | 46  | 4     | 43    | 47  | 254160.193 | -0.069     | -0.057  |
| 47   | 3      | 44     | 47   | 46  | 4     | 43    | 46  | 254161.377 | -0.030     |         |
| 47   | 2      | 45     | 48   | 47  | 1     | 46    | 48  | 284683.648 | -0.003     | 0.014   |
| 47   | 2      | 45     | 46   | 47  | 1     | 46    | 46  | 284683.648 | 0.032      | 0.014   |
| 47   | 2      | 45     | 47   | 47  | 1     | 46    | 47  | 284685.269 | -0.025     |         |
| 48   | 3      | 45     | 47   | 47  | 4     | 44    | 46  | 271286.612 | 0.033      | 0.022   |
| 48   | 3      | 45     | 49   | 47  | 4     | 44    | 48  | 271286.612 | 0.010      | 0.022   |
| 48   | 2      | 46     | 49   | 48  | 1     | 47    | 49  | 295837.459 | 0.002      | 0.019   |
| 48   | 2      | 46     | 47   | 48  | 1     | 47    | 47  | 295837.459 | 0.036      | 0.019   |
| 48   | 2      | 46     | 48   | 48  | 1     | 47    | 48  | 295839.036 | -0.031     |         |
| 49   | 3      | 46     | 48   | 48  | 4     | 45    | 47  | 288499.736 | 0.002      | -0.009  |
| 49   | 3      | 46     | 50   | 48  | 4     | 45    | 49  | 288499.736 | -0.021     | -0.009  |
| 49   | 3      | 46     | 49   | 48  | 4     | 45    | 48  | 288500.870 | -0.011     |         |
| 49   | 2      | 47     | 50   | 49  | 1     | 48    | 50  | 306981.862 | -0.011     | 0.006   |

*Continued on next page*

Table S6 – *Continued from previous page*

| $J'$ | $K'_a$ | $K'_c$ | $F'$ | $J$ | $K_a$ | $K_c$ | $F$ | Frequency  | Obs.-Calc. | Average |
|------|--------|--------|------|-----|-------|-------|-----|------------|------------|---------|
| 49   | 2      | 47     | 48   | 49  | 1     | 48    | 48  | 306981.862 | 0.022      | 0.006   |
| 49   | 2      | 47     | 49   | 49  | 1     | 48    | 49  | 306983.426 | -0.021     |         |
| 50   | 3      | 47     | 49   | 49  | 4     | 46    | 48  | 305768.568 | -0.072     |         |
| 50   | 3      | 47     | 51   | 49  | 4     | 46    | 50  | 305768.617 | -0.045     |         |
| 52   | 3      | 49     | 53   | 52  | 2     | 50    | 53  | 235945.166 | -0.025     | -0.013  |
| 52   | 3      | 49     | 51   | 52  | 2     | 50    | 51  | 235945.166 | -0.001     | -0.013  |
| 52   | 3      | 49     | 52   | 52  | 2     | 50    | 52  | 235946.469 | 0.031      |         |
| 53   | 3      | 50     | 54   | 53  | 2     | 51    | 54  | 245532.131 | -0.036     | -0.024  |
| 53   | 3      | 50     | 52   | 53  | 2     | 51    | 52  | 245532.131 | -0.012     | -0.024  |
| 53   | 3      | 50     | 53   | 53  | 2     | 51    | 53  | 245533.458 | 0.005      |         |
| 54   | 3      | 51     | 55   | 54  | 2     | 52    | 55  | 255574.021 | 0.010      | 0.022   |
| 54   | 3      | 51     | 53   | 54  | 2     | 52    | 53  | 255574.021 | 0.034      | 0.022   |
| 54   | 3      | 51     | 54   | 54  | 2     | 52    | 54  | 255575.245 | -0.086     |         |
| 54   | 5      | 49     | 55   | 54  | 4     | 50    | 55  | 312780.342 | 0.011      | 0.004   |
| 54   | 5      | 49     | 53   | 54  | 4     | 50    | 53  | 312780.342 | -0.002     | 0.004   |
| 55   | 3      | 52     | 56   | 55  | 2     | 53    | 56  | 266025.795 | -0.015     | -0.003  |
| 55   | 3      | 52     | 54   | 55  | 2     | 53    | 54  | 266025.795 | 0.010      | -0.003  |
| 55   | 3      | 52     | 55   | 55  | 2     | 53    | 55  | 266027.135 | -0.020     |         |
| 55   | 5      | 50     | 55   | 55  | 4     | 51    | 55  | 307671.844 | -0.070     |         |
| 55   | 5      | 50     | 56   | 55  | 4     | 51    | 56  | 307672.590 | 0.026      | 0.020   |
| 55   | 5      | 50     | 54   | 55  | 4     | 51    | 54  | 307672.590 | 0.014      | 0.020   |
| 56   | 3      | 53     | 57   | 56  | 2     | 54    | 57  | 276839.630 | -0.007     | 0.005   |
| 56   | 3      | 53     | 55   | 56  | 2     | 54    | 55  | 276839.630 | 0.017      | 0.005   |
| 56   | 3      | 53     | 56   | 56  | 2     | 54    | 56  | 276841.036 | 0.034      |         |
| 56   | 5      | 51     | 56   | 56  | 4     | 52    | 56  | 302587.279 | -0.047     |         |
| 56   | 5      | 51     | 57   | 56  | 4     | 52    | 57  | 302587.995 | 0.036      | 0.031   |
| 56   | 5      | 51     | 55   | 56  | 4     | 52    | 55  | 302587.995 | 0.025      | 0.031   |
| 57   | 4      | 53     | 56   | 56  | 5     | 52    | 55  | 259600.666 | 0.044      | 0.035   |
| 57   | 4      | 53     | 58   | 56  | 5     | 52    | 57  | 259600.666 | 0.026      | 0.035   |
| 57   | 4      | 53     | 57   | 56  | 5     | 52    | 56  | 259601.702 | 0.019      |         |
| 57   | 3      | 54     | 58   | 57  | 2     | 55    | 58  | 287965.501 | 0.002      | 0.014   |
| 57   | 3      | 54     | 56   | 57  | 2     | 55    | 56  | 287965.501 | 0.026      | 0.014   |
| 57   | 3      | 54     | 57   | 57  | 2     | 55    | 57  | 287966.847 | -0.028     |         |
| 57   | 5      | 52     | 57   | 57  | 4     | 53    | 57  | 297582.603 | -0.065     |         |
| 57   | 5      | 52     | 58   | 57  | 4     | 53    | 58  | 297583.243 | -0.033     | -0.038  |
| 57   | 5      | 52     | 56   | 57  | 4     | 53    | 56  | 297583.243 | -0.044     | -0.038  |
| 58   | 5      | 53     | 59   | 58  | 4     | 54    | 59  | 292717.471 | -0.012     | -0.017  |

*Continued on next page*



Table S6 – *Continued from previous page*

| $J'$ | $K'_a$ | $K'_c$ | $F'$ | $J$ | $K_a$ | $K_c$ | $F$ | Frequency  | Obs.-Calc. | Average |
|------|--------|--------|------|-----|-------|-------|-----|------------|------------|---------|
| 58   | 5      | 53     | 57   | 58  | 4     | 54    | 57  | 292717.471 | -0.022     | -0.017  |
| 59   | 5      | 54     | 60   | 59  | 4     | 55    | 60  | 288050.808 | 0.057      | 0.052   |
| 59   | 5      | 54     | 58   | 59  | 4     | 55    | 58  | 288050.808 | 0.047      | 0.052   |
| 59   | 4      | 55     | 58   | 58  | 5     | 54    | 57  | 295798.157 | -0.020     | -0.028  |
| 59   | 4      | 55     | 60   | 58  | 5     | 54    | 59  | 295798.157 | -0.037     | -0.028  |
| 59   | 4      | 55     | 59   | 58  | 5     | 54    | 58  | 295799.266 | 0.003      |         |
| 60   | 4      | 56     | 61   | 60  | 3     | 57    | 61  | 234094.508 | 0.027      | 0.032   |
| 60   | 4      | 56     | 59   | 60  | 3     | 57    | 59  | 234094.508 | 0.037      | 0.032   |
| 60   | 5      | 55     | 61   | 60  | 4     | 56    | 61  | 283643.453 | -0.015     | -0.019  |
| 60   | 5      | 55     | 59   | 60  | 4     | 56    | 59  | 283643.453 | -0.023     | -0.019  |
| 61   | 5      | 56     | 62   | 61  | 4     | 57    | 62  | 279555.197 | -0.072     | -0.076  |
| 61   | 5      | 56     | 60   | 61  | 4     | 57    | 60  | 279555.197 | -0.079     | -0.076  |
| 62   | 4      | 58     | 63   | 62  | 3     | 59    | 63  | 246006.411 | 0.008      | 0.014   |
| 62   | 4      | 58     | 61   | 62  | 3     | 59    | 61  | 246006.411 | 0.020      | 0.014   |
| 63   | 4      | 59     | 64   | 63  | 3     | 60    | 64  | 253005.303 | -0.106     | -0.099  |
| 63   | 4      | 59     | 62   | 63  | 3     | 60    | 62  | 253005.303 | -0.093     | -0.099  |
| 63   | 4      | 59     | 63   | 63  | 3     | 60    | 63  | 253006.278 | 0.056      |         |
| 64   | 4      | 60     | 65   | 64  | 3     | 61    | 65  | 260678.091 | -0.034     | -0.028  |
| 64   | 4      | 60     | 63   | 64  | 3     | 61    | 63  | 260678.091 | -0.021     | -0.028  |
| 64   | 4      | 60     | 64   | 64  | 3     | 61    | 64  | 260679.075 | 0.076      |         |
| 65   | 4      | 61     | 66   | 65  | 3     | 62    | 66  | 269001.011 | -0.033     | -0.026  |
| 65   | 4      | 61     | 64   | 65  | 3     | 62    | 64  | 269001.011 | -0.019     | -0.026  |
| 65   | 4      | 61     | 65   | 65  | 3     | 62    | 65  | 269002.057 | 0.084      |         |
| 66   | 4      | 62     | 67   | 66  | 3     | 63    | 67  | 277944.858 | -0.004     | 0.004   |
| 66   | 4      | 62     | 65   | 66  | 3     | 63    | 65  | 277944.858 | 0.011      | 0.004   |
| 66   | 4      | 62     | 66   | 66  | 3     | 63    | 66  | 277945.767 | -0.073     |         |
| 67   | 4      | 63     | 68   | 67  | 3     | 64    | 68  | 287474.647 | -0.037     | -0.030  |
| 67   | 4      | 63     | 66   | 67  | 3     | 64    | 66  | 287474.647 | -0.022     | -0.030  |
| 67   | 4      | 63     | 67   | 67  | 3     | 64    | 67  | 287475.736 | 0.027      |         |
| 75   | 5      | 70     | 76   | 75  | 4     | 71    | 76  | 281948.484 | -0.028     | -0.025  |
| 75   | 5      | 70     | 74   | 75  | 4     | 71    | 74  | 281948.484 | -0.022     | -0.025  |
| 76   | 5      | 71     | 77   | 76  | 4     | 72    | 77  | 287530.460 | -0.023     | -0.019  |
| 76   | 5      | 71     | 75   | 76  | 4     | 72    | 75  | 287530.460 | -0.015     | -0.019  |
| 61   | 4      | 57     | 62   | 61  | 3     | 58    | 62  | 239698.828 | 0.047      | 0.053   |
| 61   | 4      | 57     | 60   | 61  | 3     | 58    | 60  | 239698.828 | 0.058      | 0.053   |
| 42   | 3      | 40     | 43   | 42  | 2     | 41    | 43  | 299106.220 | -0.006     | 0.006   |
| 42   | 3      | 40     | 41   | 42  | 2     | 41    | 41  | 299106.220 | 0.018      | 0.006   |

*Continued on next page*

Table S6 – *Continued from previous page*

| $J'$ | $K'_a$ | $K'_c$ | $F'$ | $J$ | $K_a$ | $K_c$ | $F$ | Frequency  | Obs.-Calc. | Average |
|------|--------|--------|------|-----|-------|-------|-----|------------|------------|---------|
| 42   | 3      | 40     | 42   | 42  | 2     | 41    | 42  | 299107.301 | 0.068      |         |
| 58   | 3      | 55     | 59   | 58  | 2     | 56    | 59  | 299352.318 | -0.012     | -0.001  |
| 58   | 3      | 55     | 57   | 58  | 2     | 56    | 57  | 299352.318 | 0.011      | -0.001  |
| 58   | 3      | 55     | 58   | 58  | 2     | 56    | 58  | 299353.695 | -0.017     |         |
| 40   | 1      | 39     | 41   | 40  | 0     | 40    | 41  | 299553.741 | 0.014      | 0.036   |
| 40   | 1      | 39     | 39   | 40  | 0     | 40    | 39  | 299553.741 | 0.057      | 0.036   |
| 40   | 1      | 39     | 40   | 40  | 0     | 40    | 40  | 299555.468 | 0.030      |         |
| 15   | 2      | 13     | 15   | 14  | 1     | 14    | 14  | 299804.715 | -0.060     |         |
| 29   | 2      | 28     | 29   | 28  | 1     | 27    | 28  | 318032.097 | 0.043      |         |
| 68   | 4      | 64     | 69   | 68  | 3     | 65    | 69  | 297550.361 | -0.044     | -0.036  |
| 68   | 4      | 64     | 67   | 68  | 3     | 65    | 67  | 297550.361 | -0.028     | -0.036  |
| 68   | 4      | 64     | 68   | 68  | 3     | 65    | 68  | 297551.523 | 0.054      |         |
| 30   | 2      | 29     | 31   | 29  | 1     | 28    | 30  | 323190.287 | -0.005     | -0.022  |
| 30   | 2      | 29     | 29   | 29  | 1     | 28    | 28  | 323190.287 | -0.038     | -0.022  |
